# Supplementary material for: Indium triflate-catalysed Diels–Alder reactions of isochromenylium cations with enones
Source: Royal Society of Chemistry journal article supplement (doi:10.1039/c3ob26284g), 2013-01-01
Supplement: c3ob26284g.pdf [file c3ob26284g.pdf]

**Electronic Supplementary Information**

**Indium Triflate-Catalysed Diels-Alder Reactions of  
Isochromenylium Cations with Enones**

Thangavel Selvi and Kannupal Srinivasan\*

*School of Chemistry, Bharathidasan University, Tiruchirappalli- 620 024, Tamil Nadu, India*

srinivasank@bdu.ac.in

Copies of  $^1\text{H}$  and  $^{13}\text{C}$  NMR spectra for compounds **3a-n** and **5a-c** and computation details and optimized geometries of transition states **TS-1** and **TS-2**

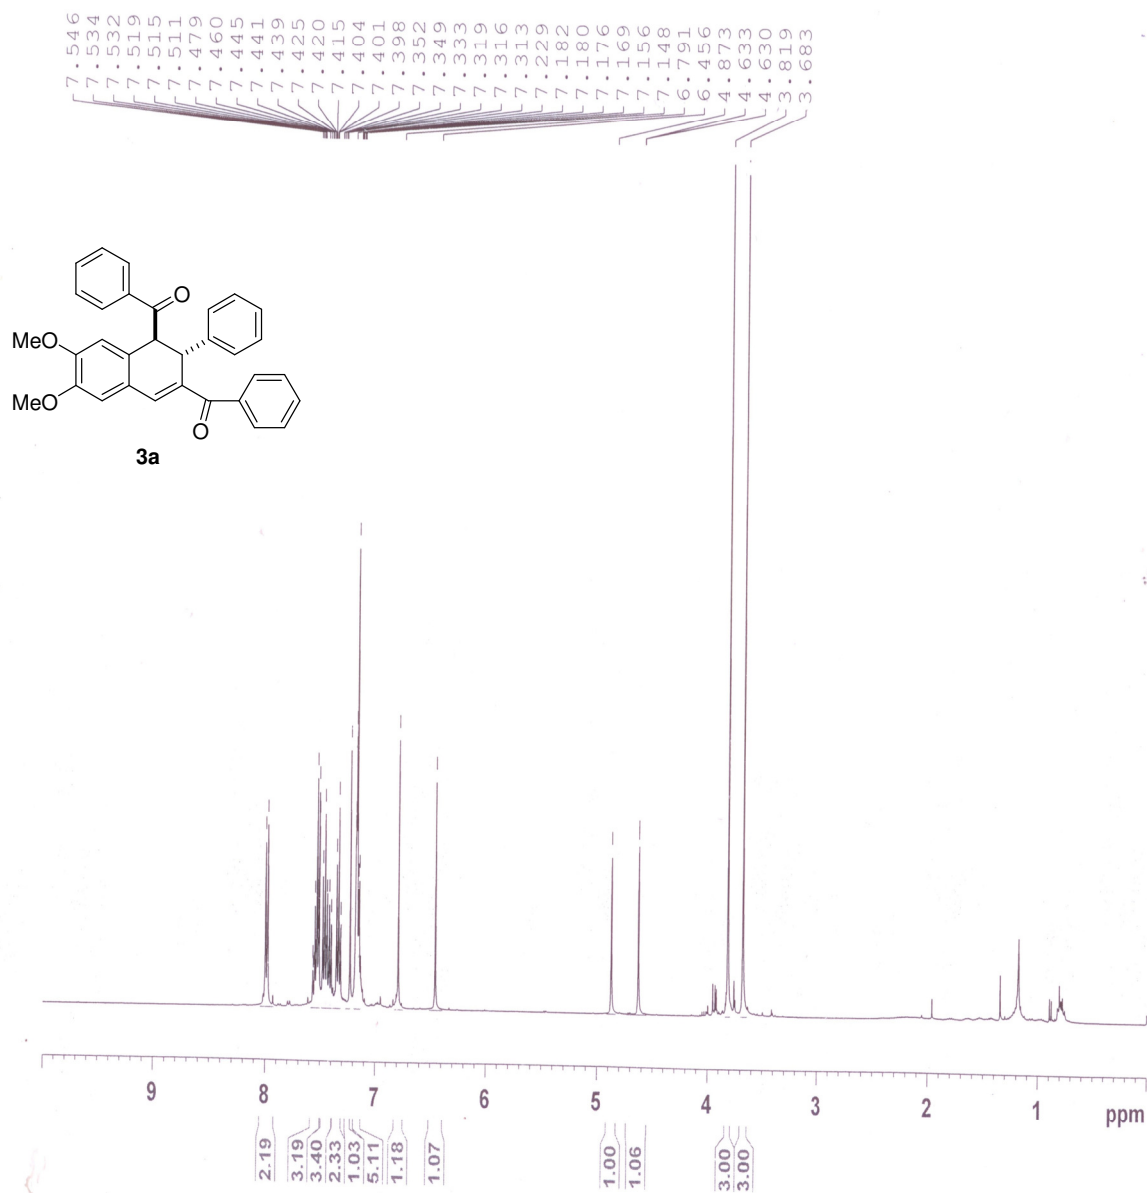

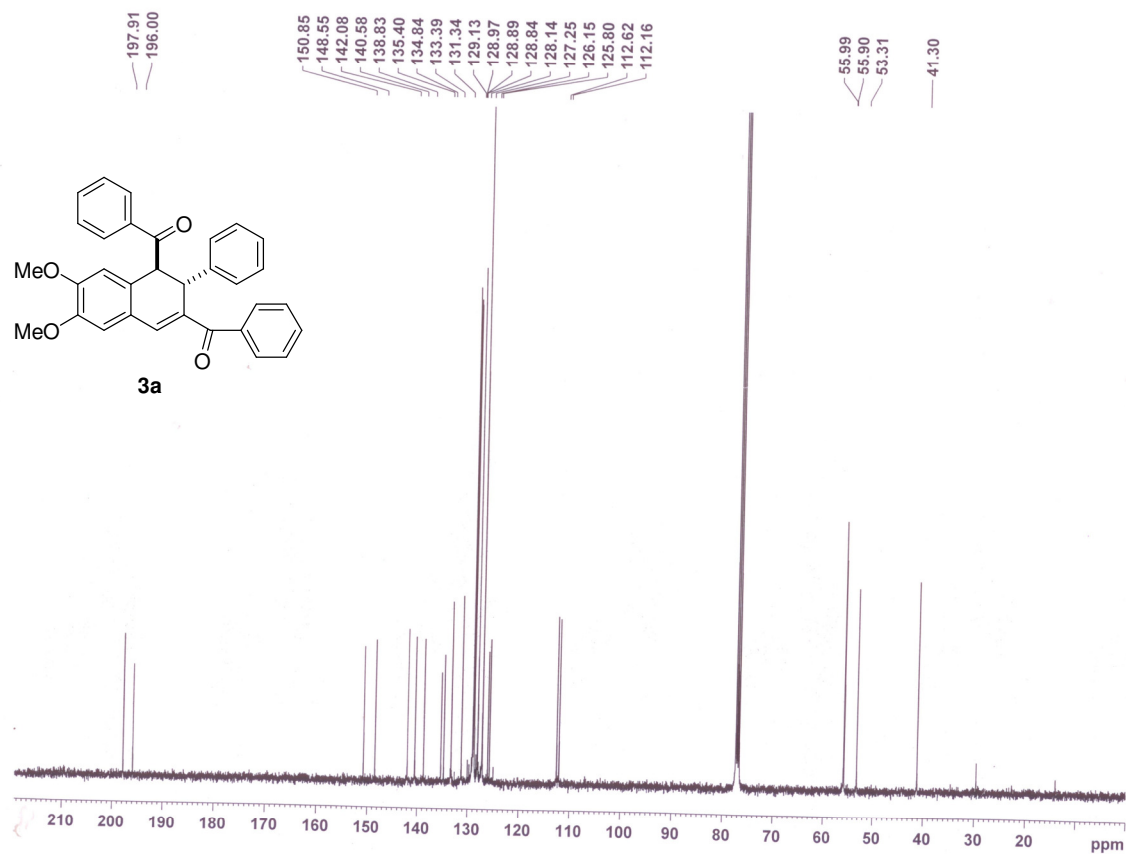

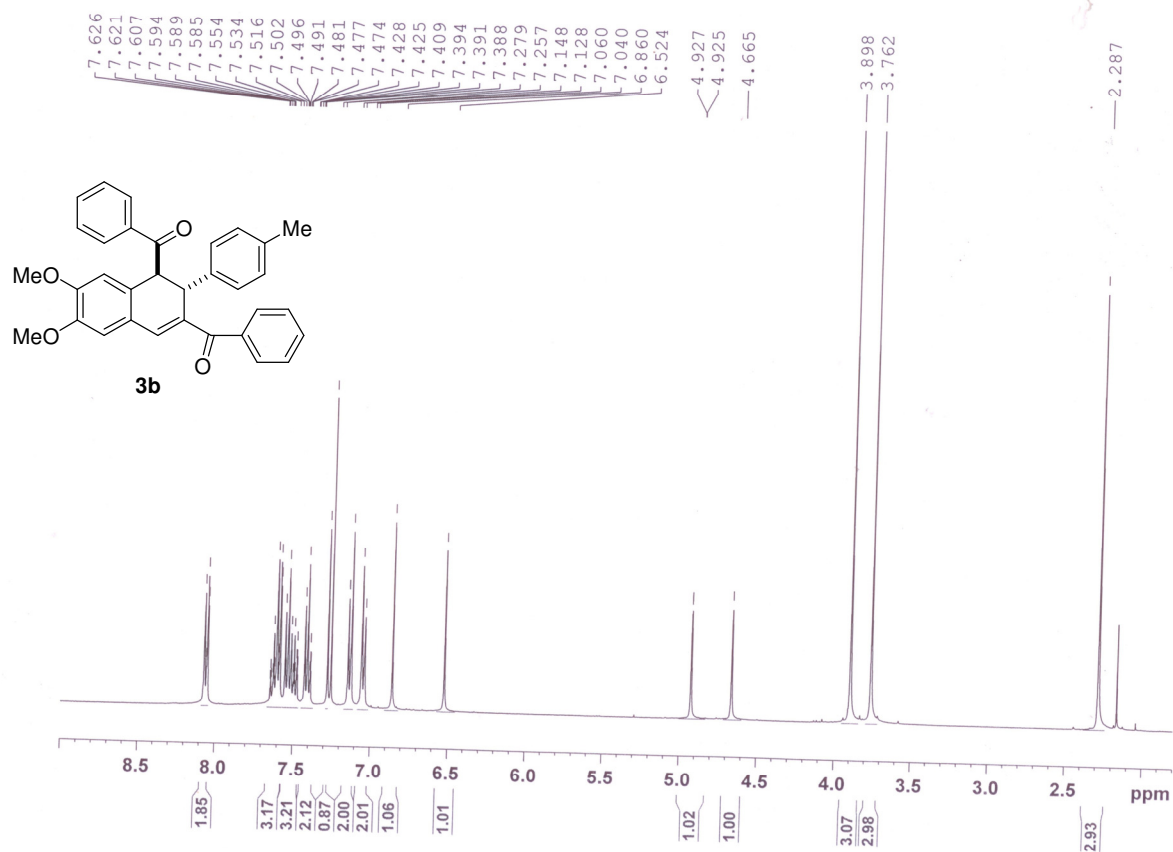



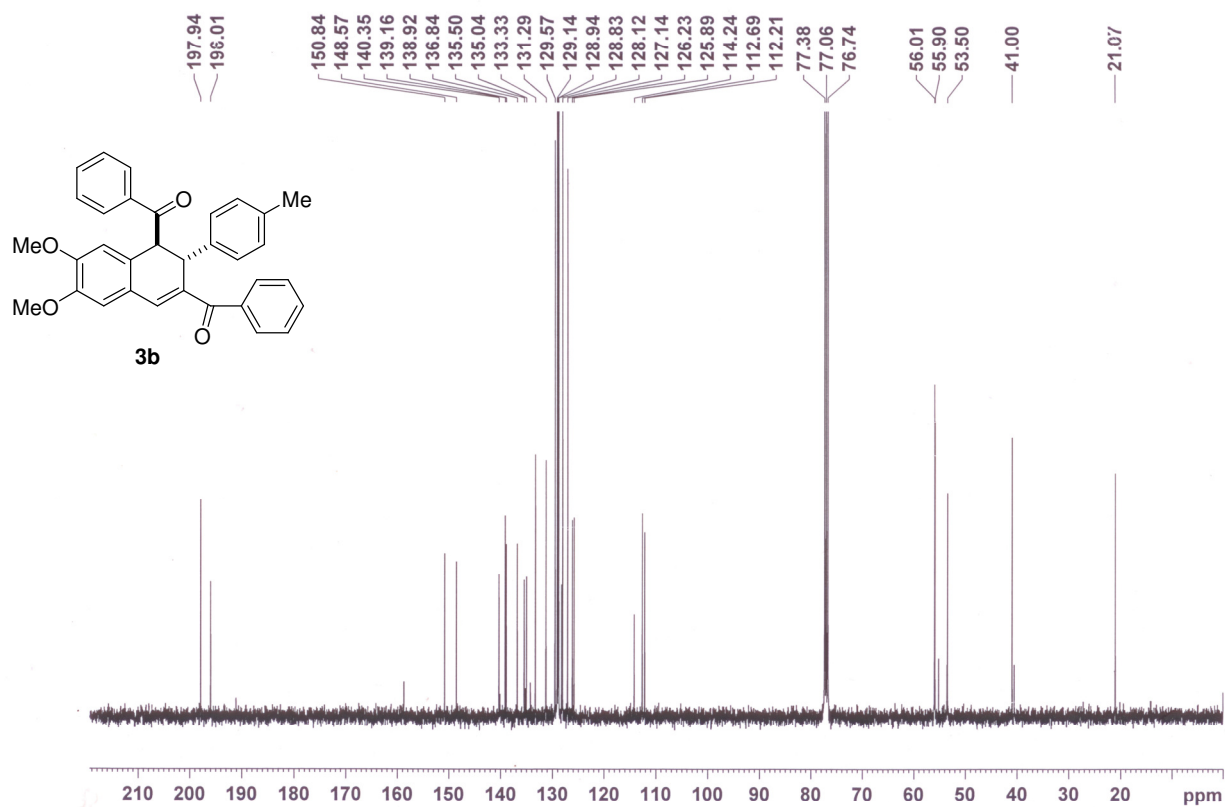

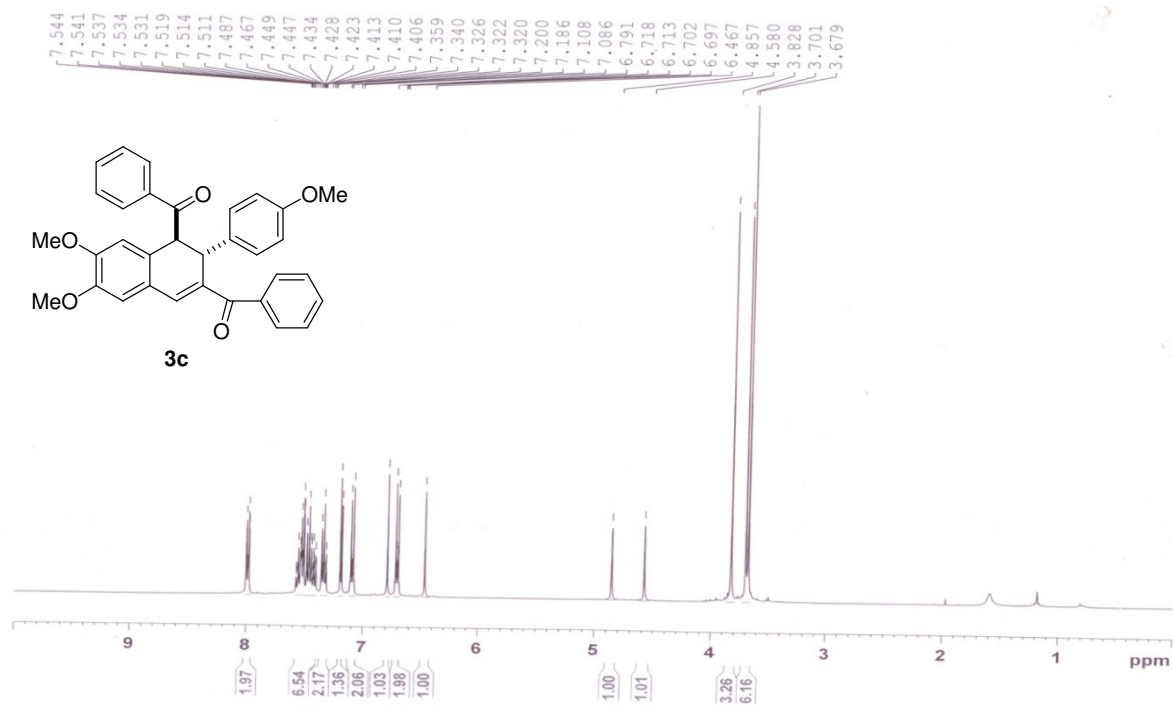

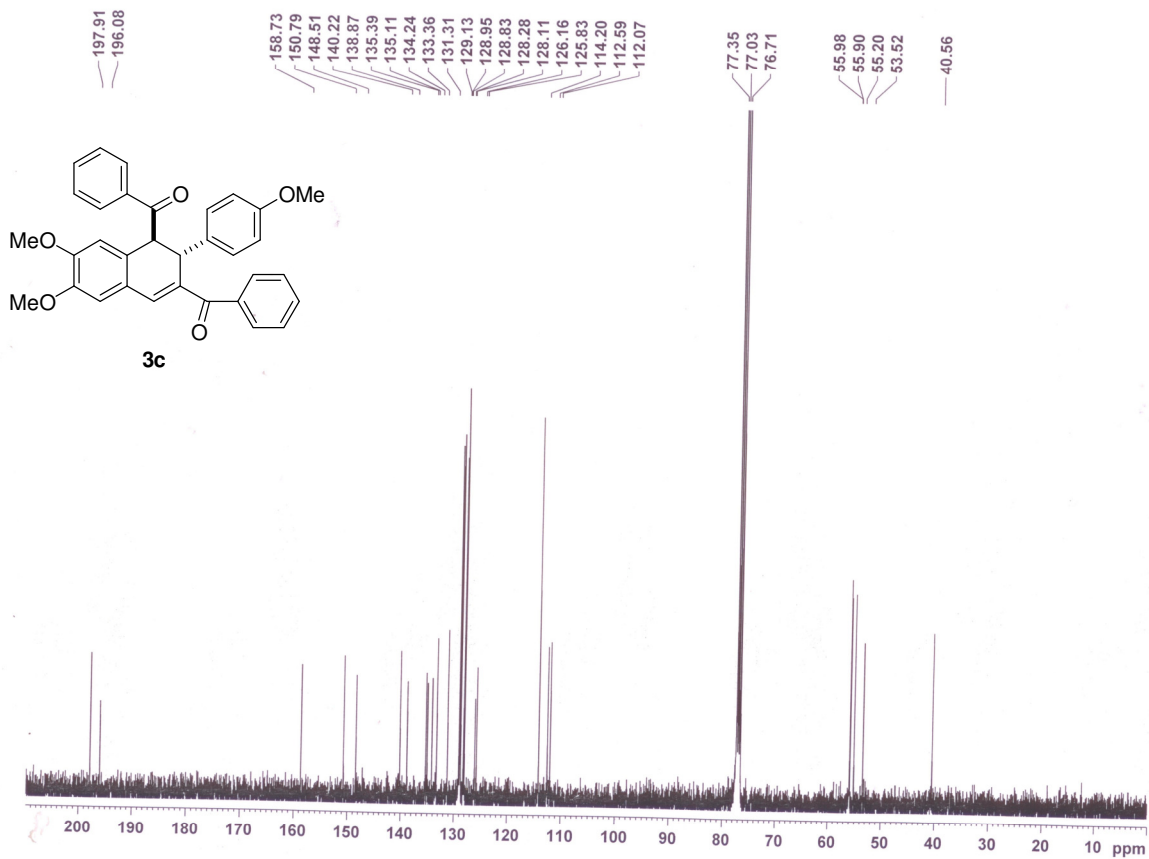

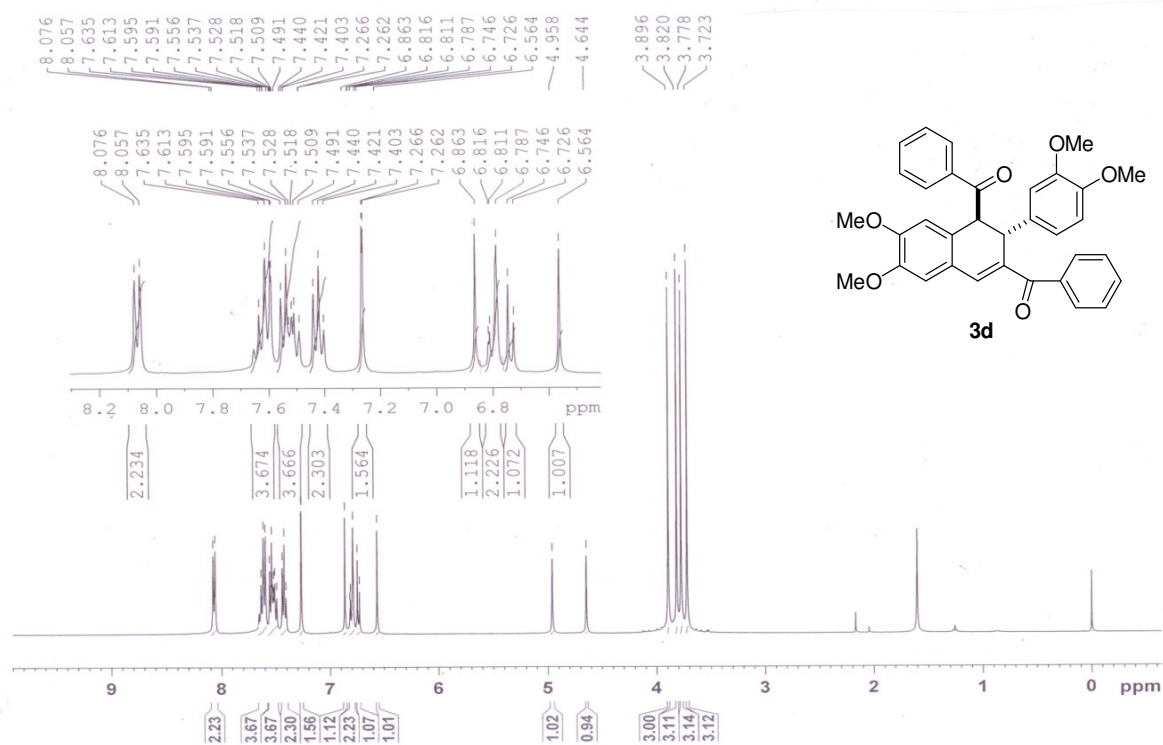

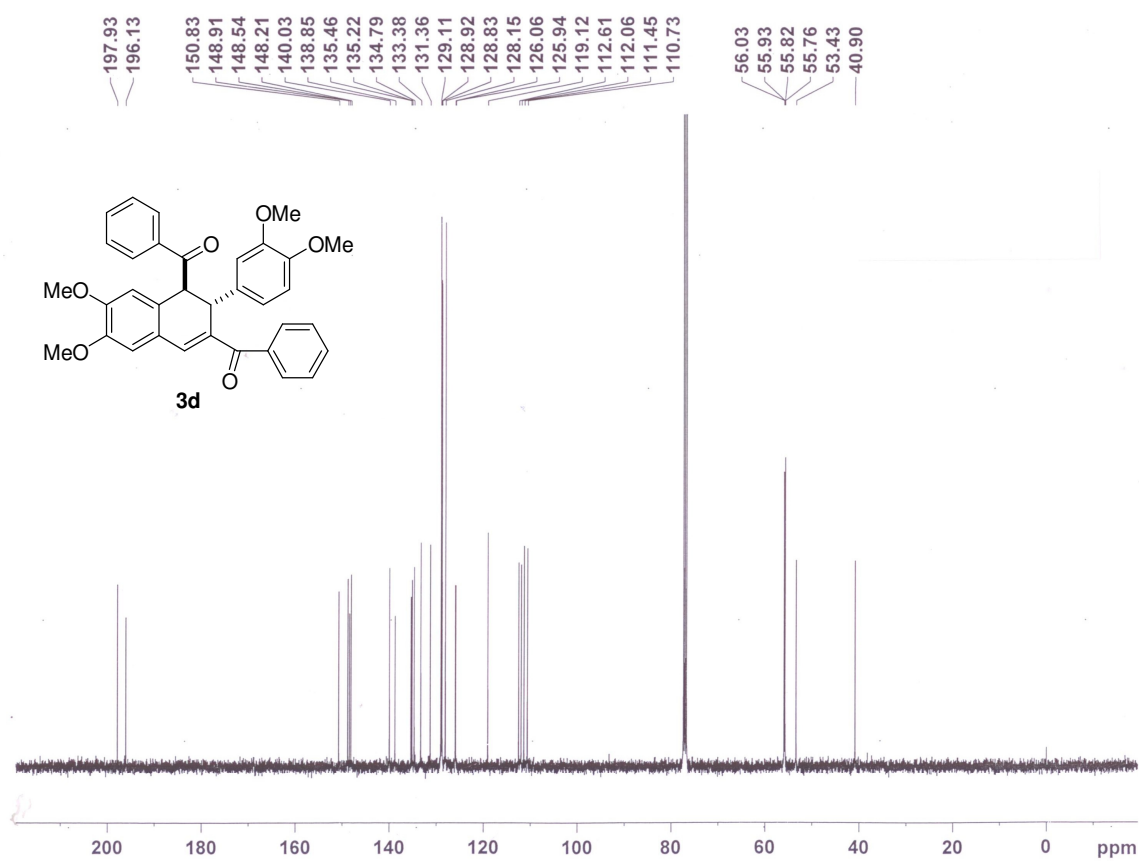

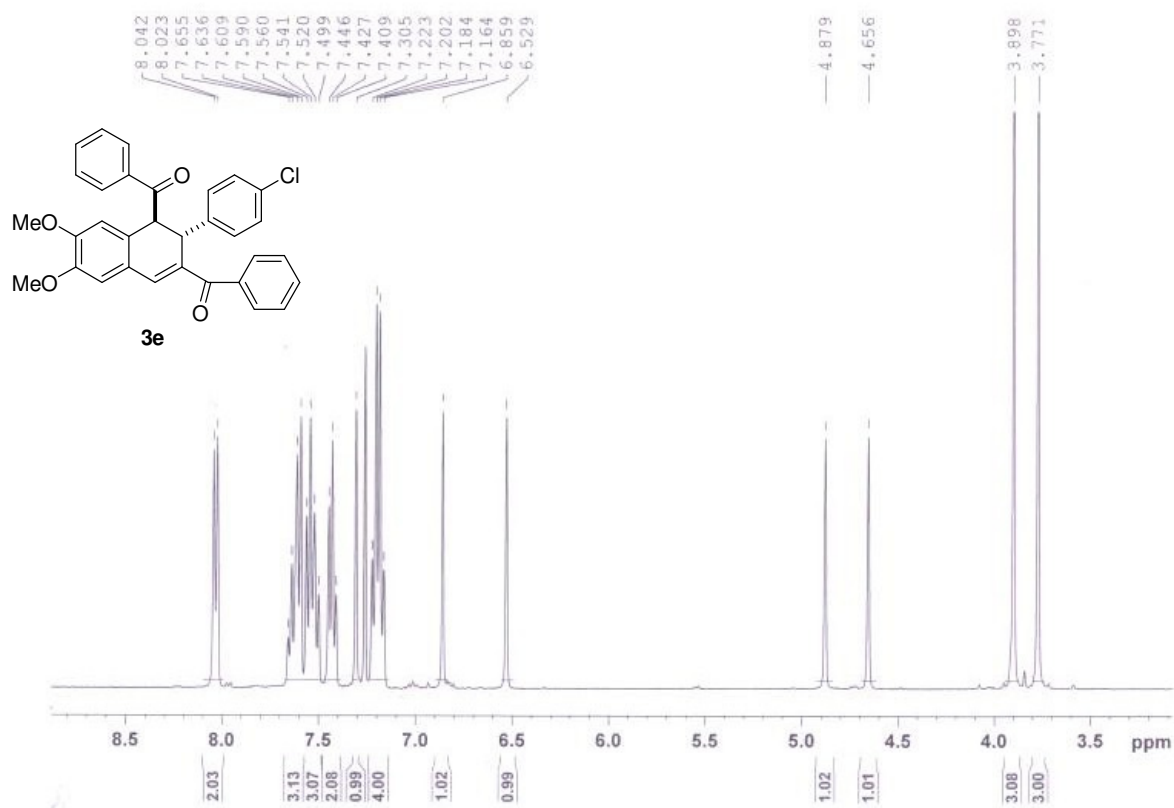

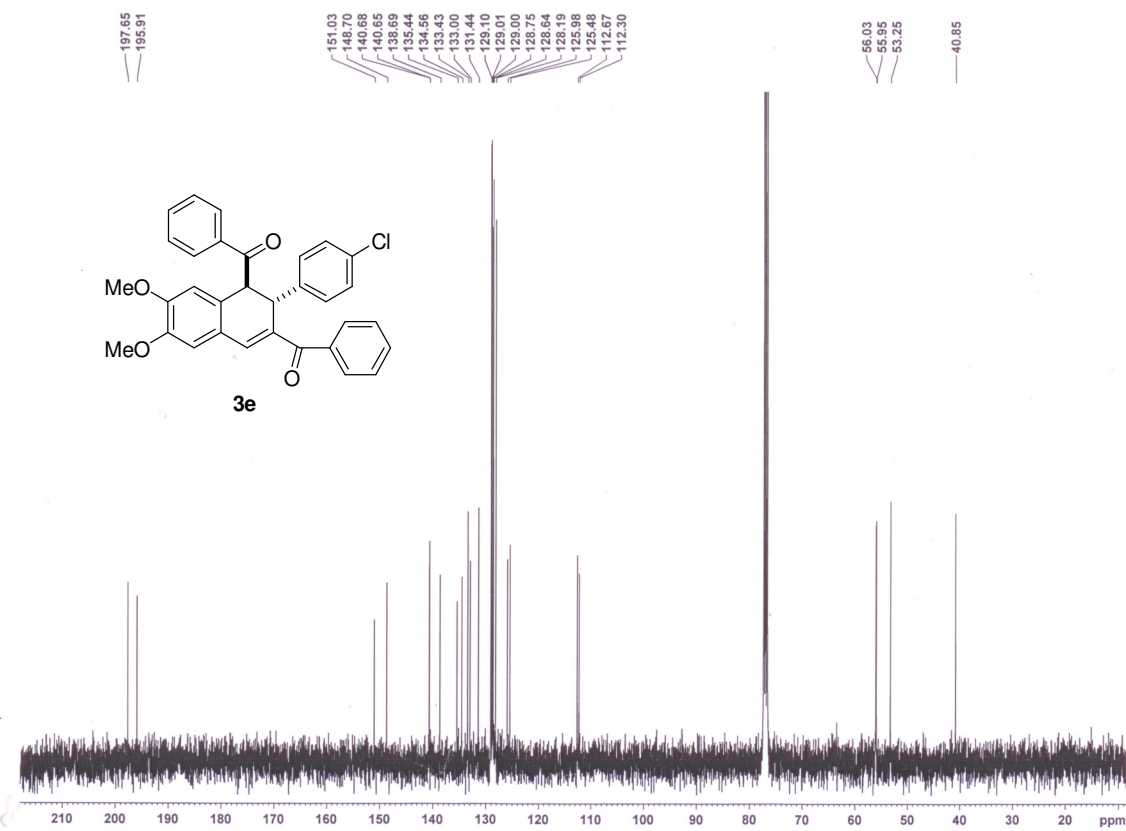

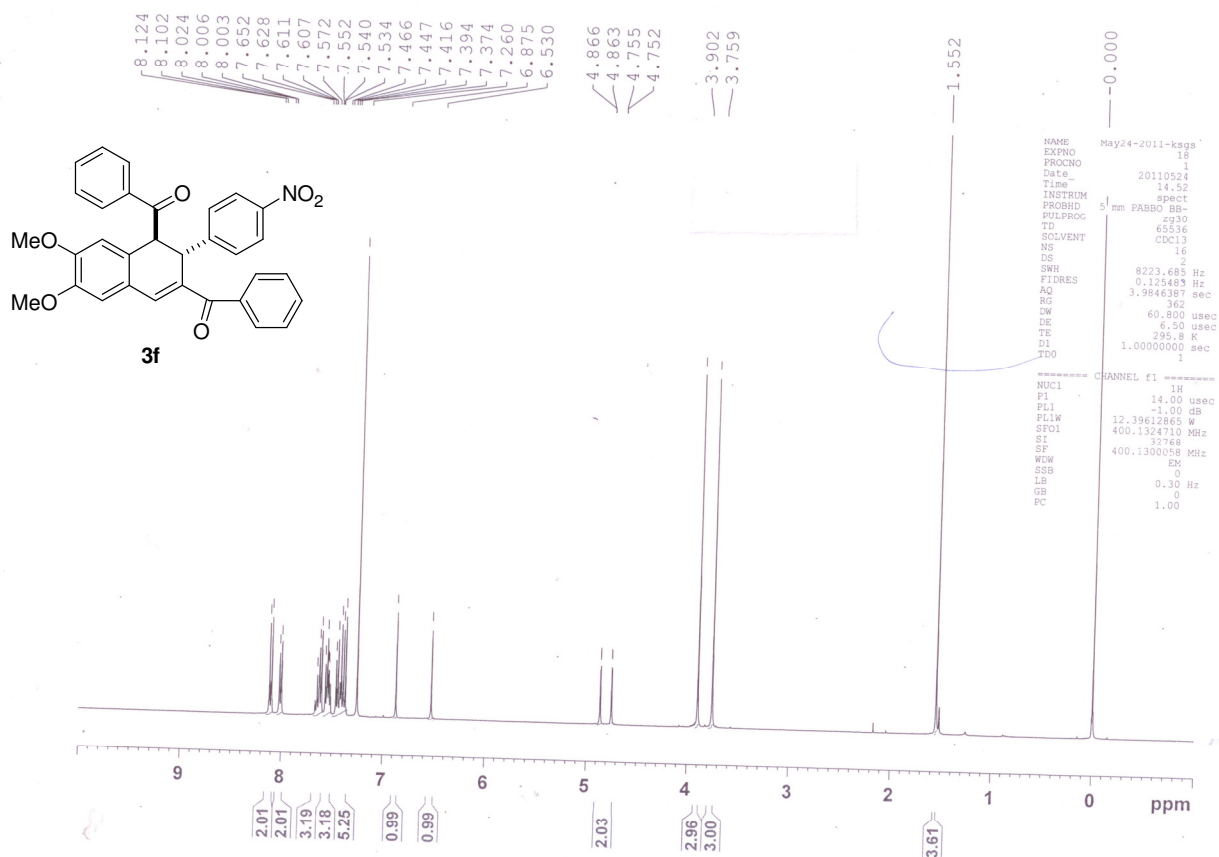



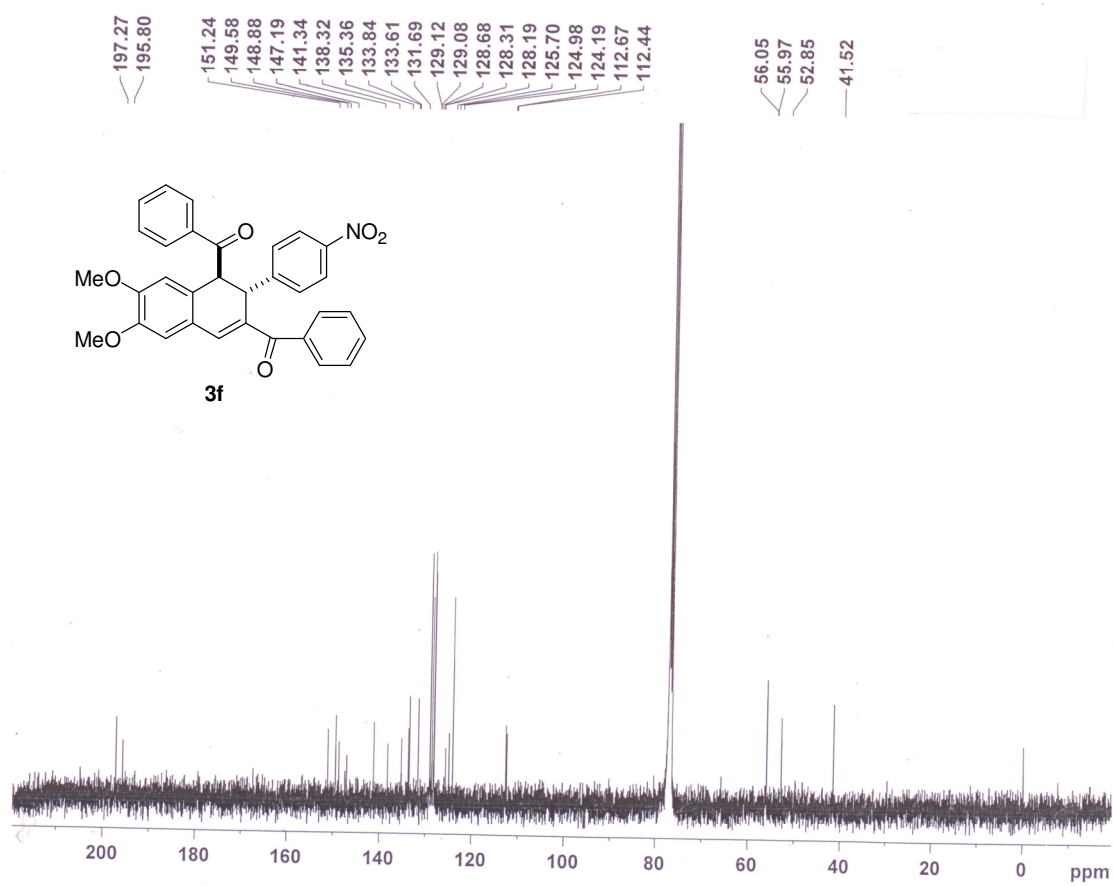

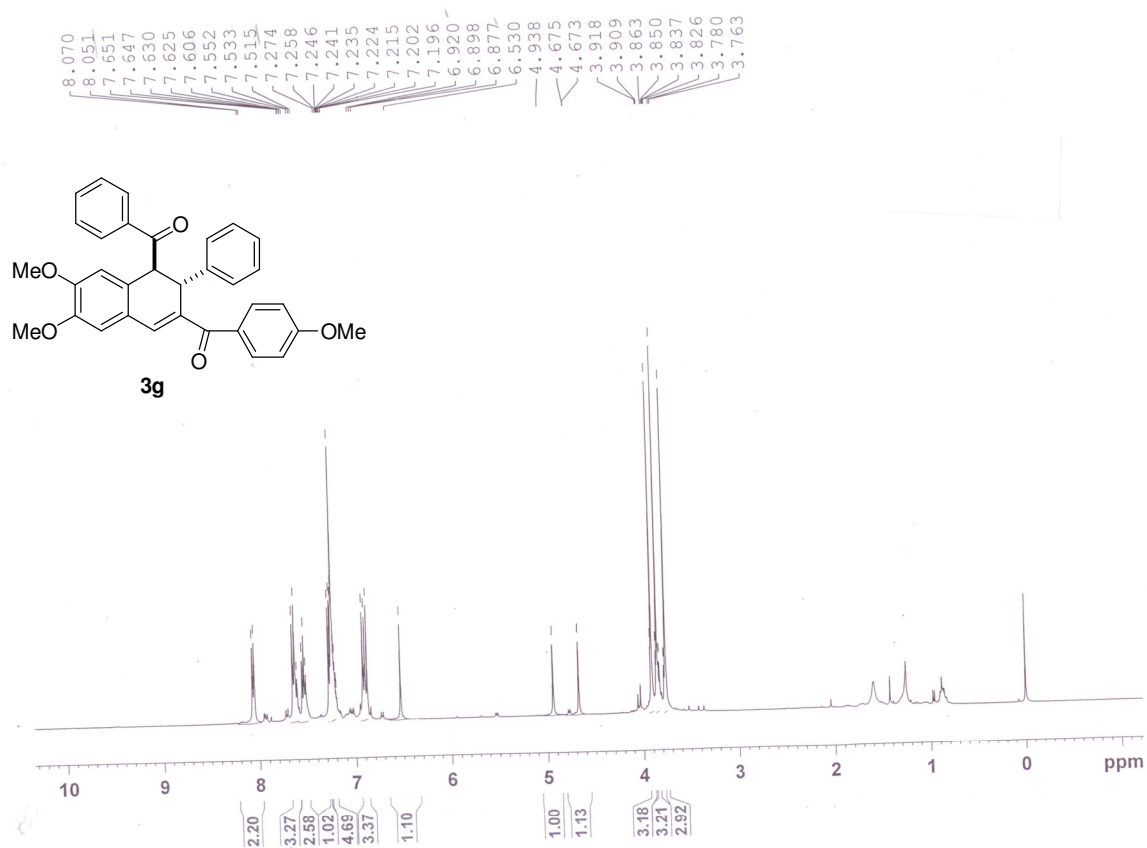

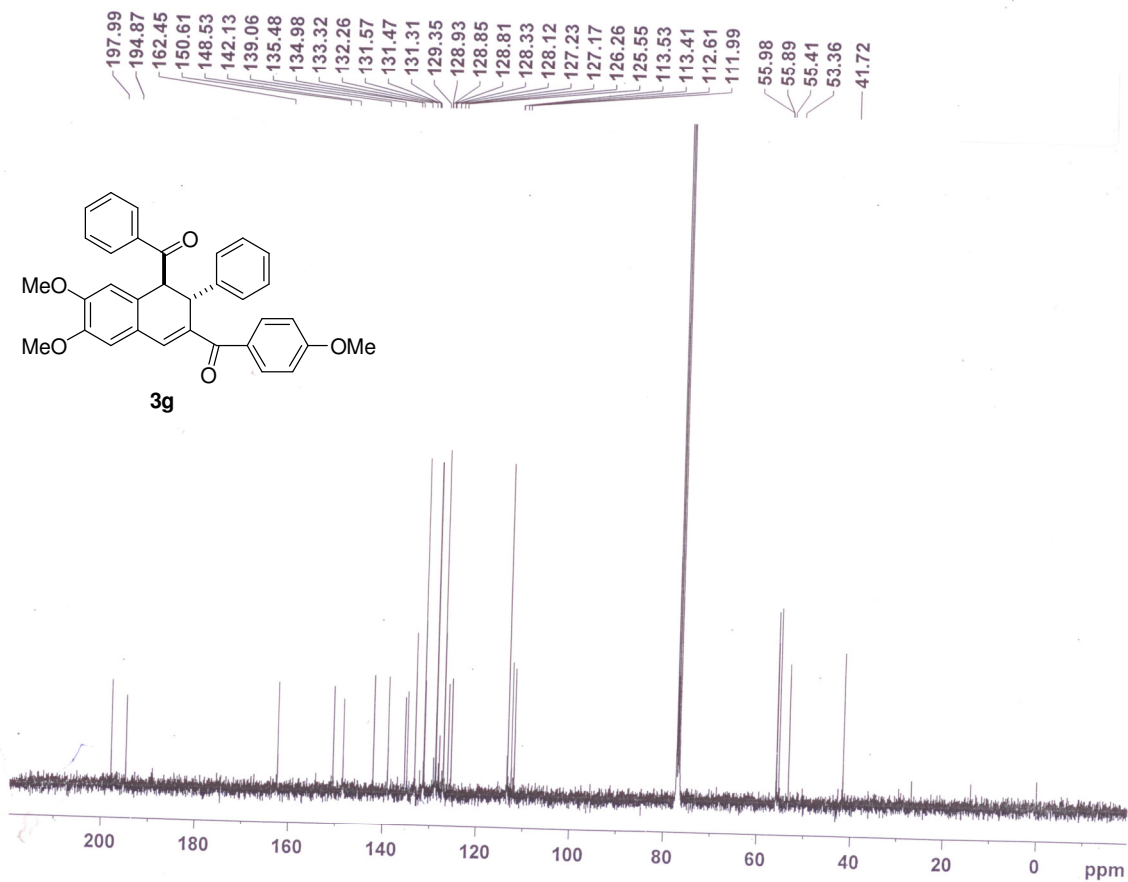

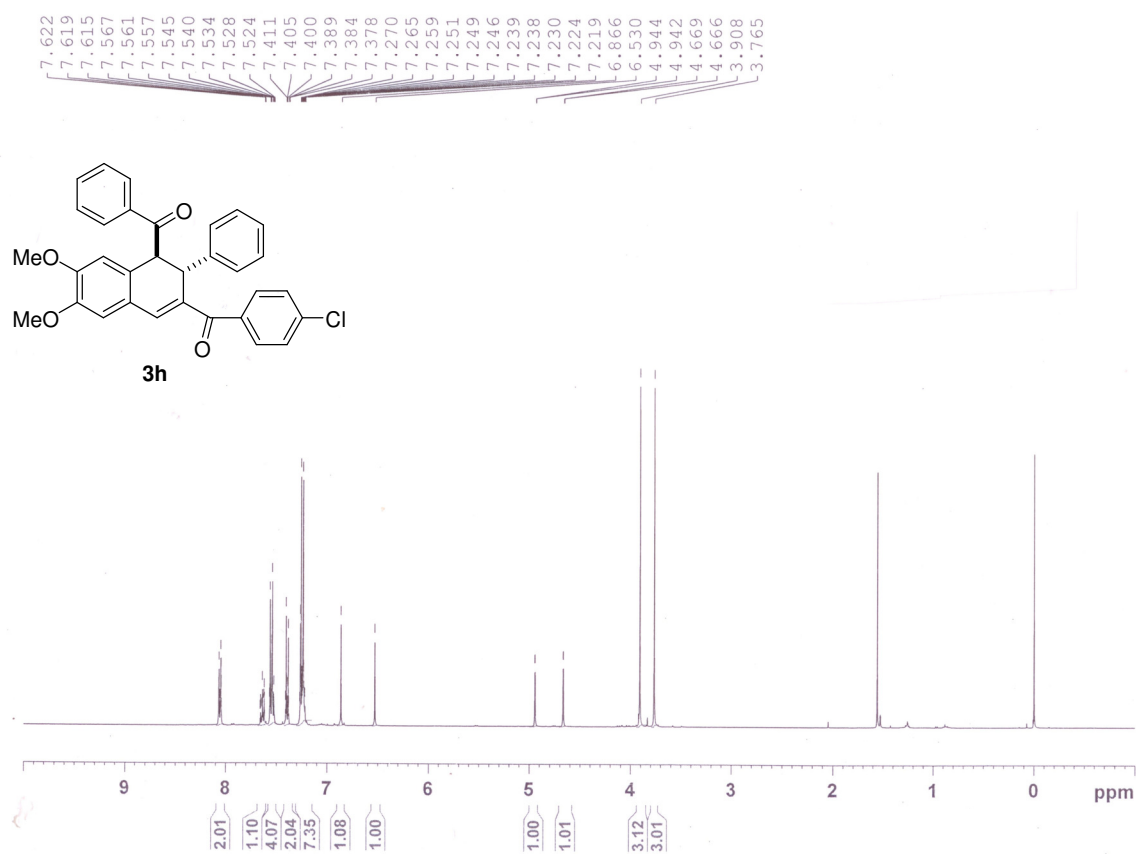

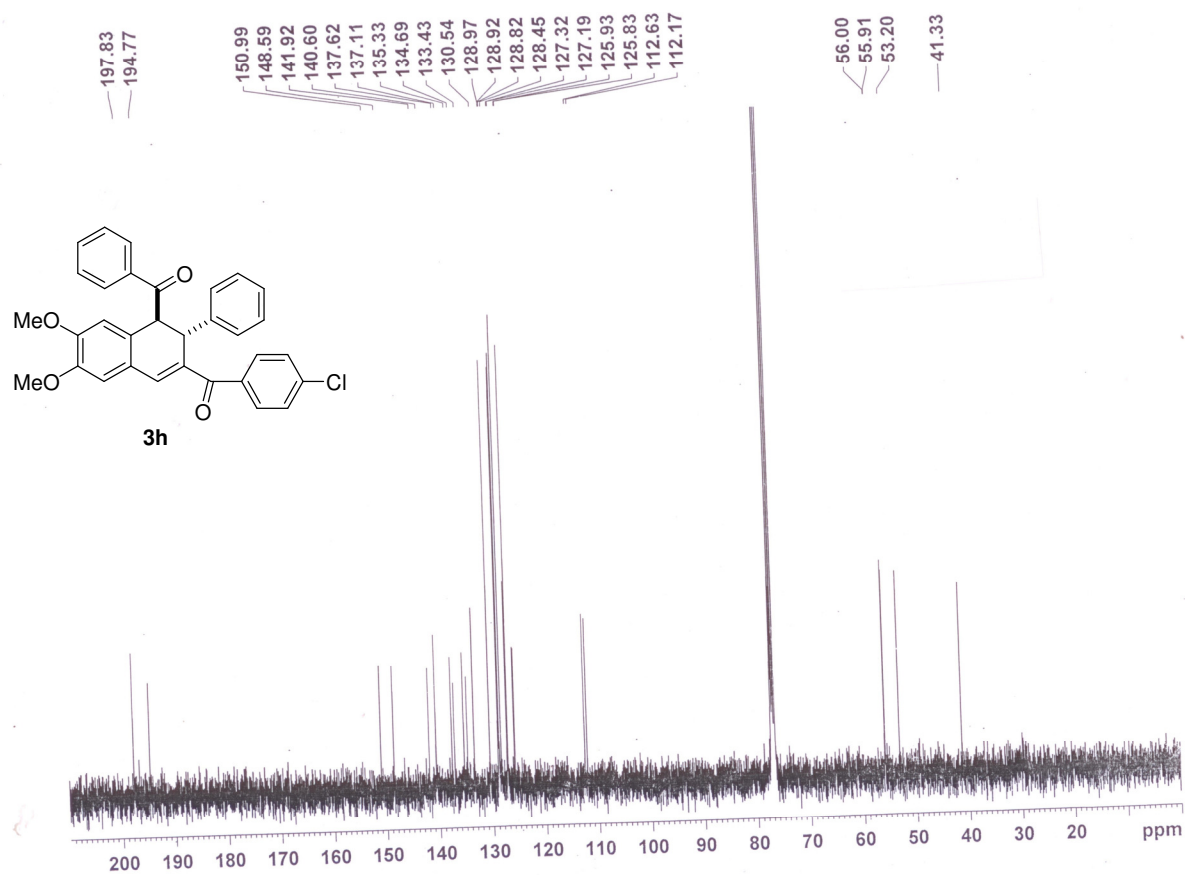

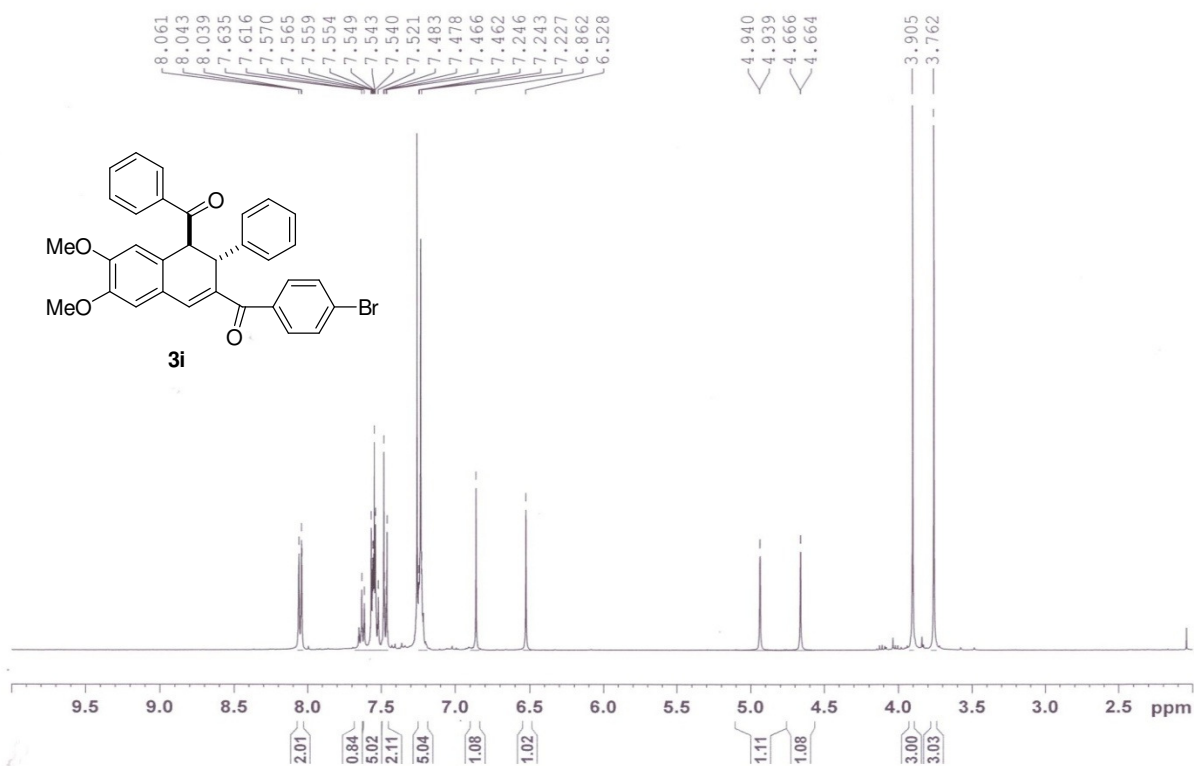

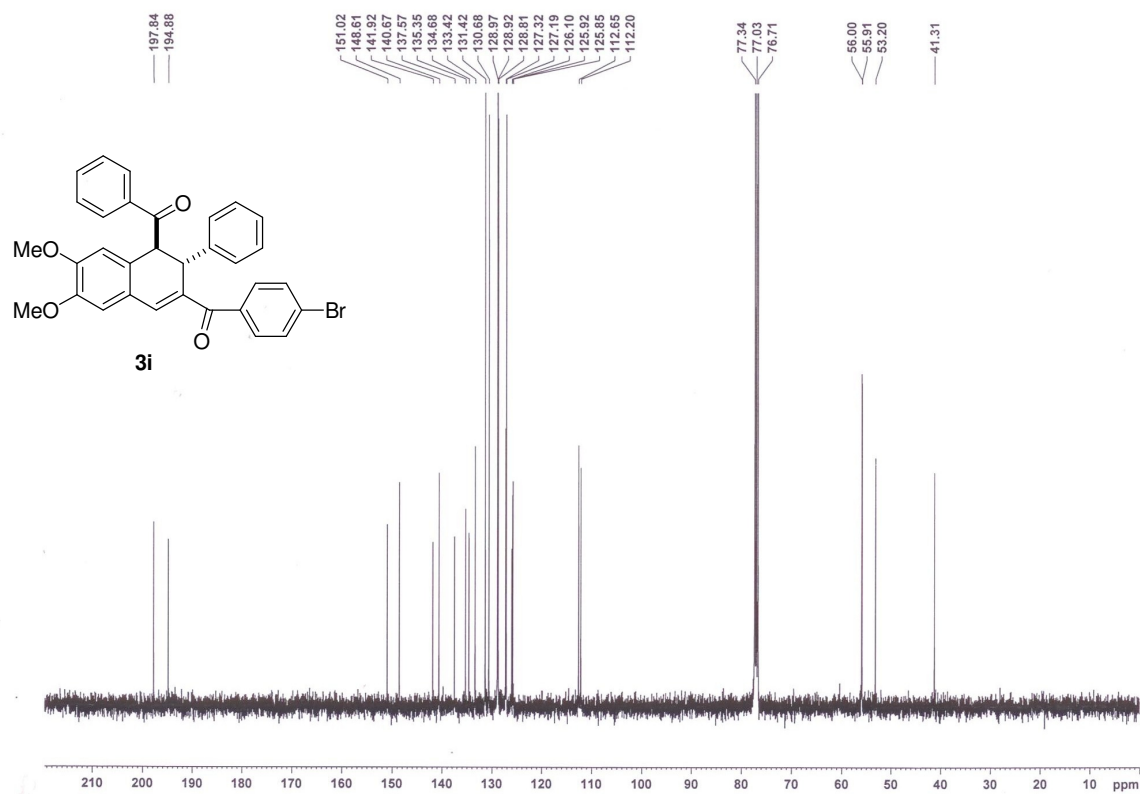

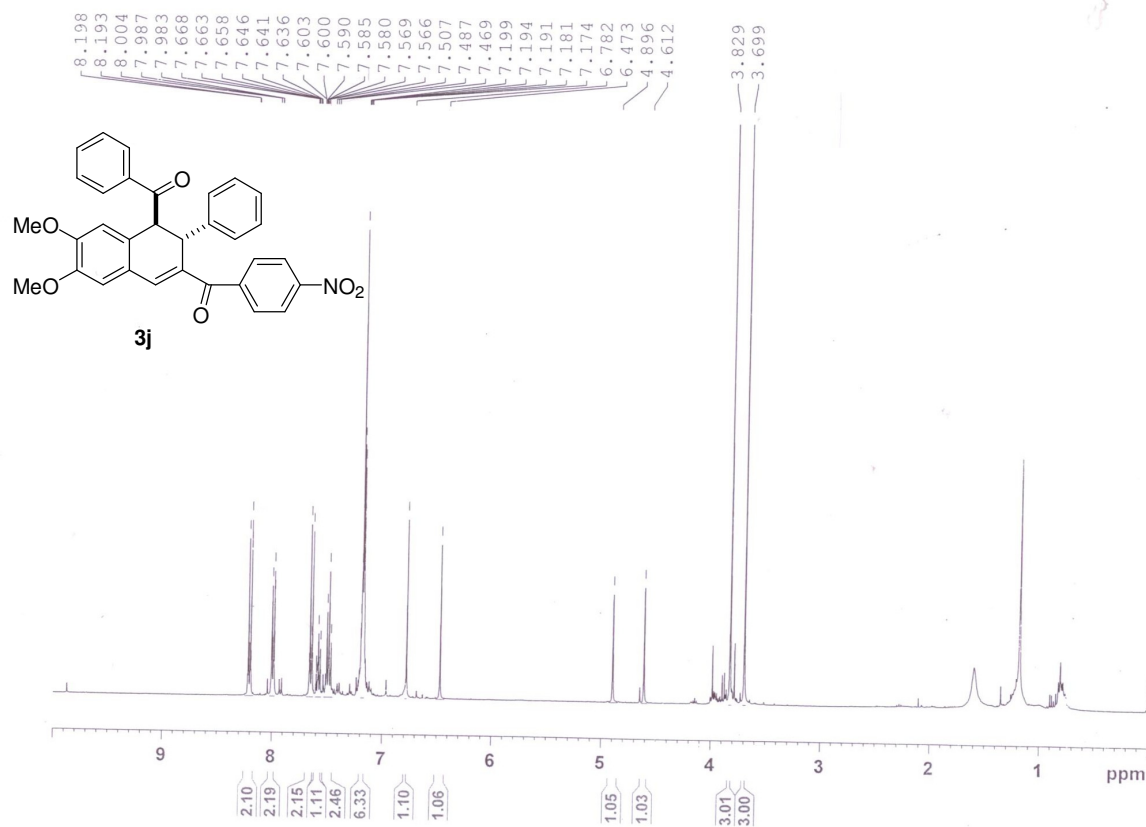



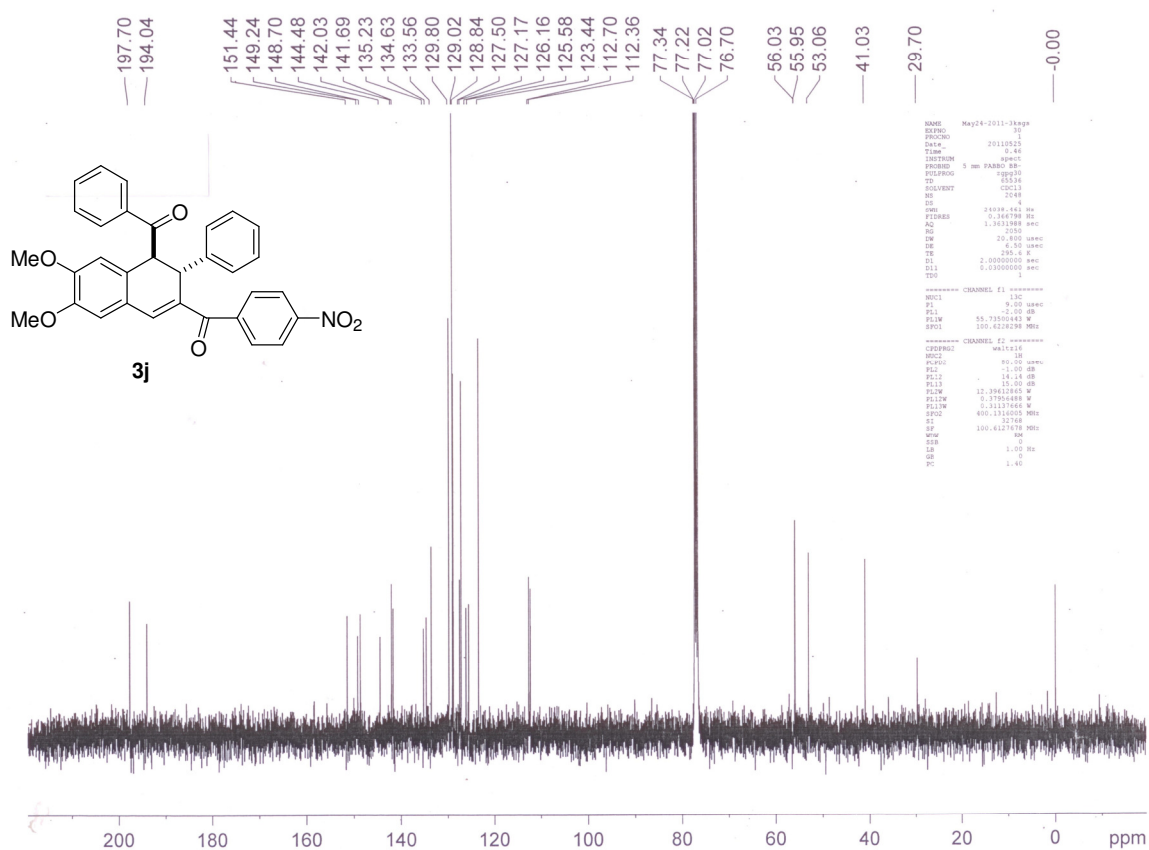

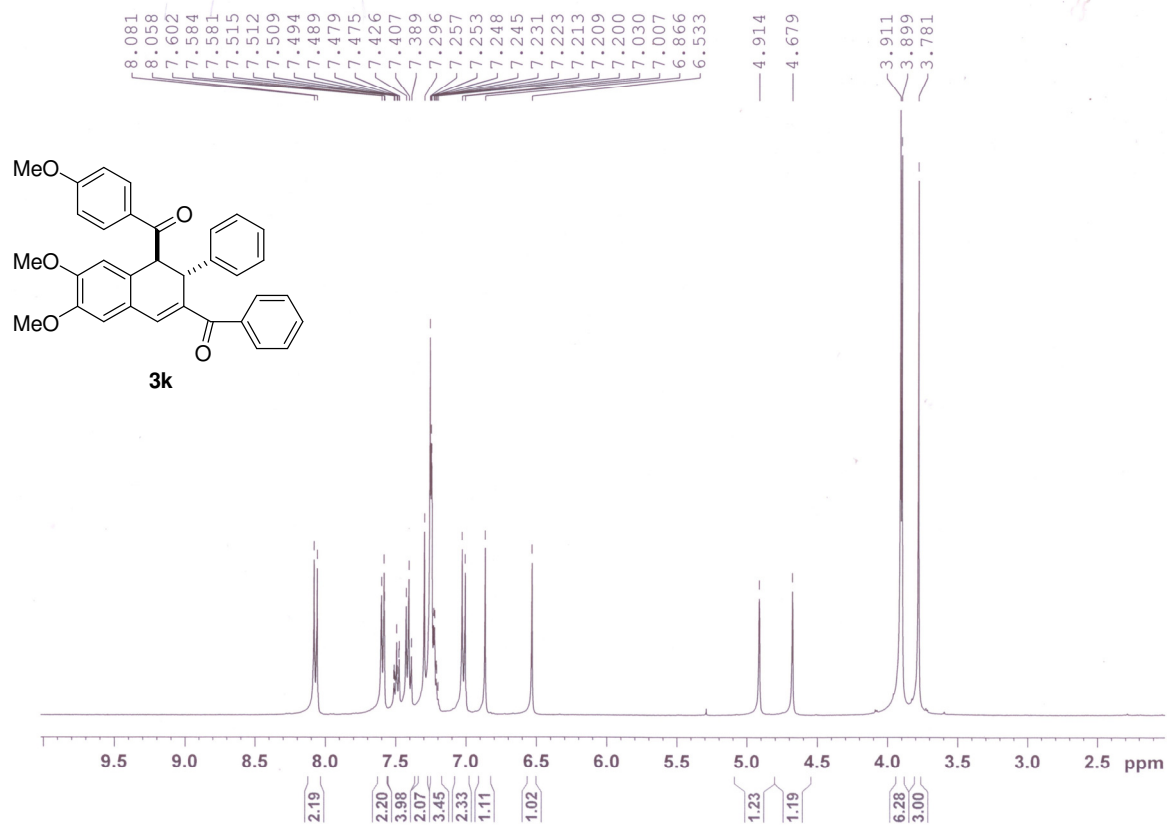

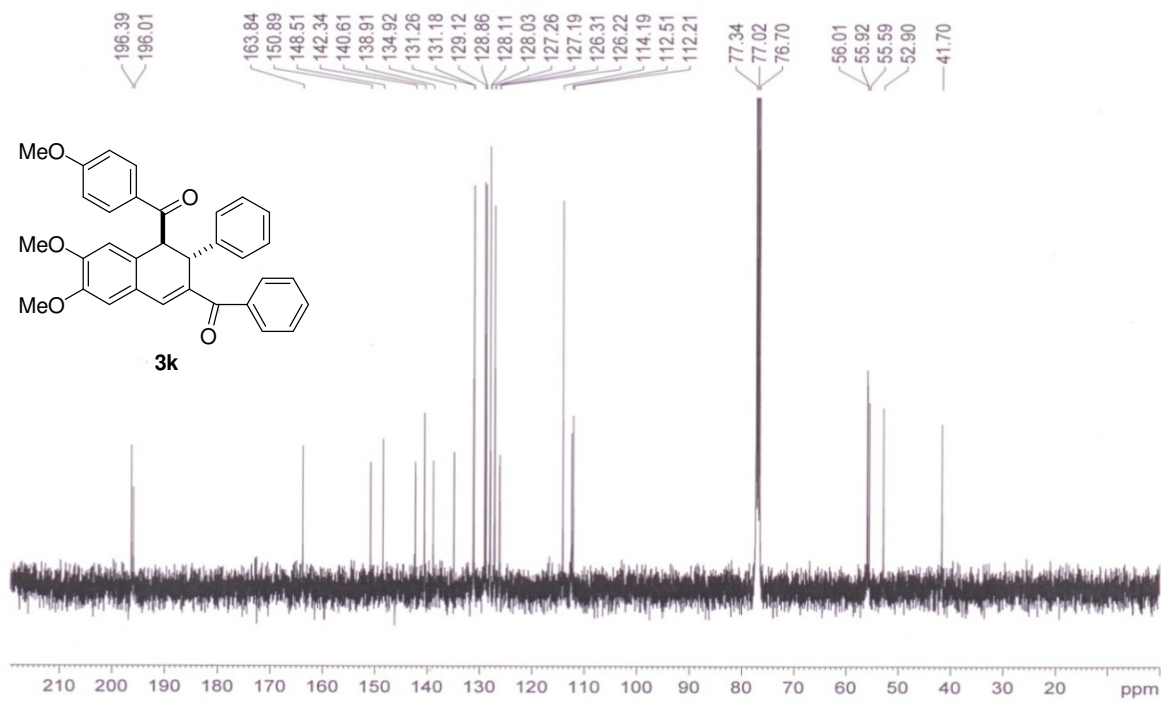

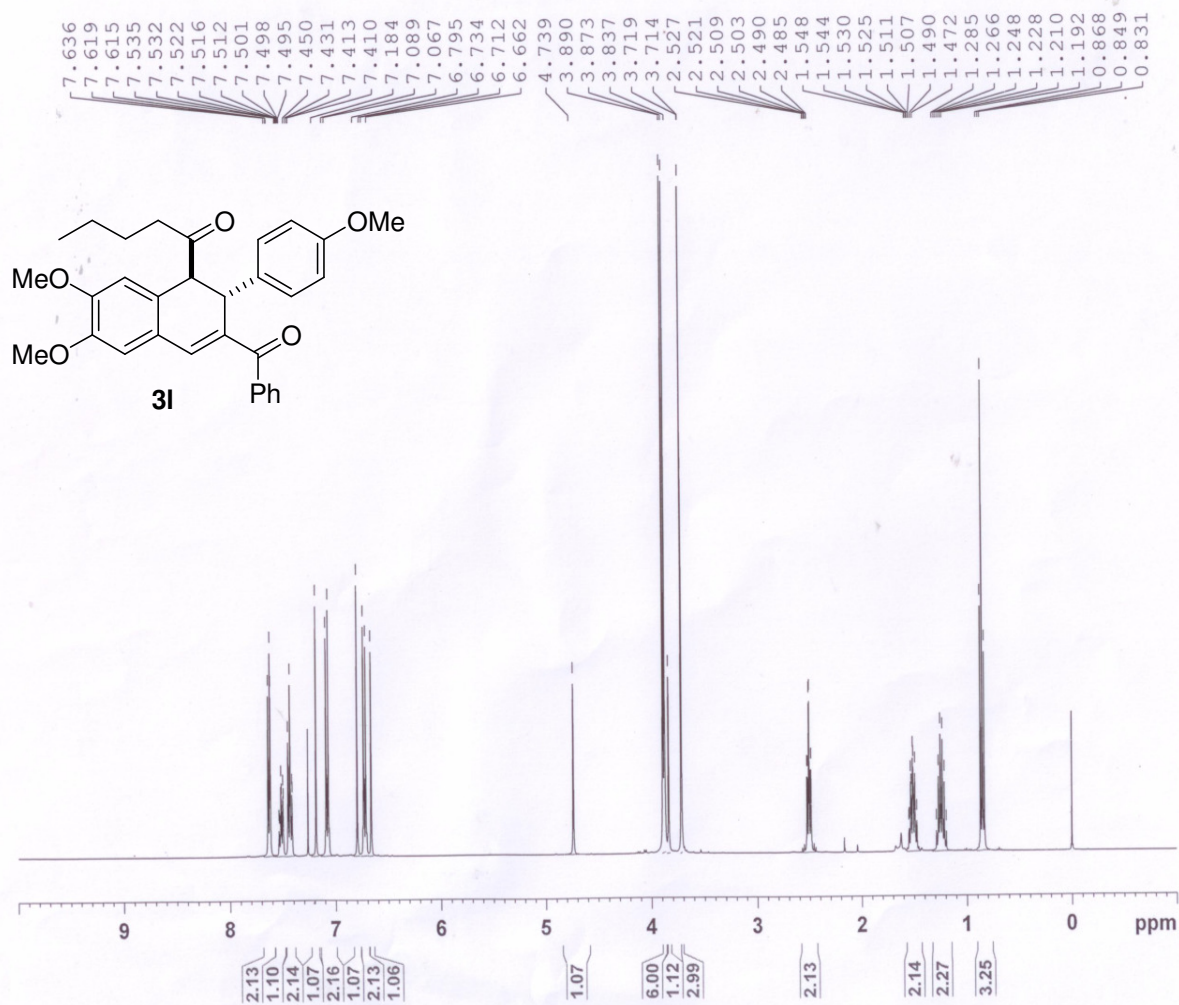

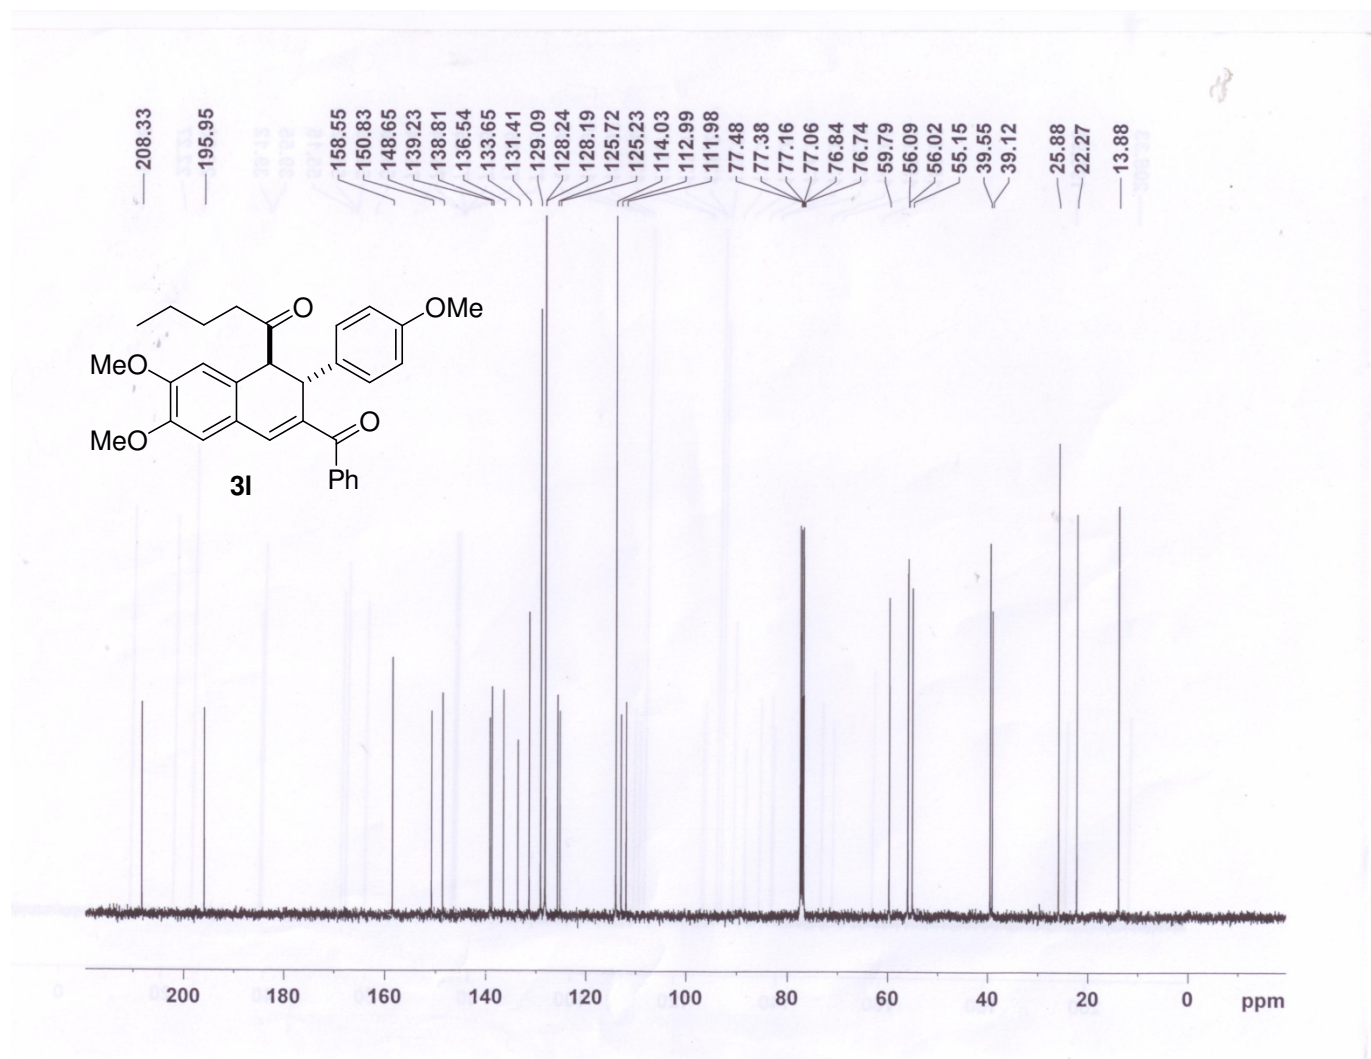

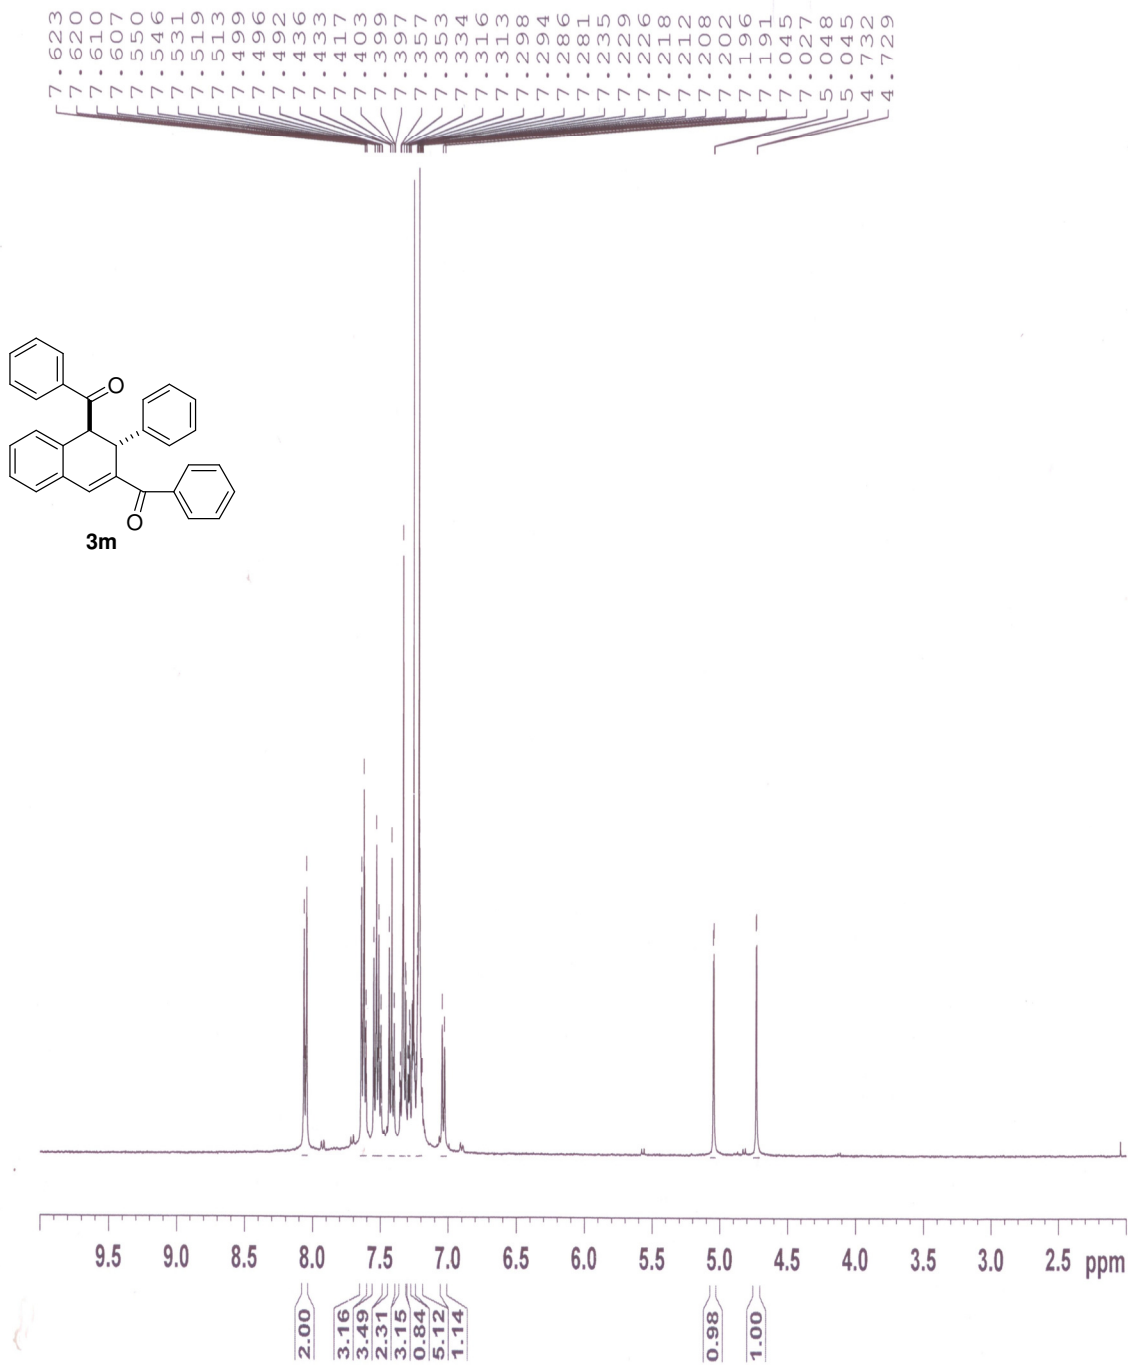

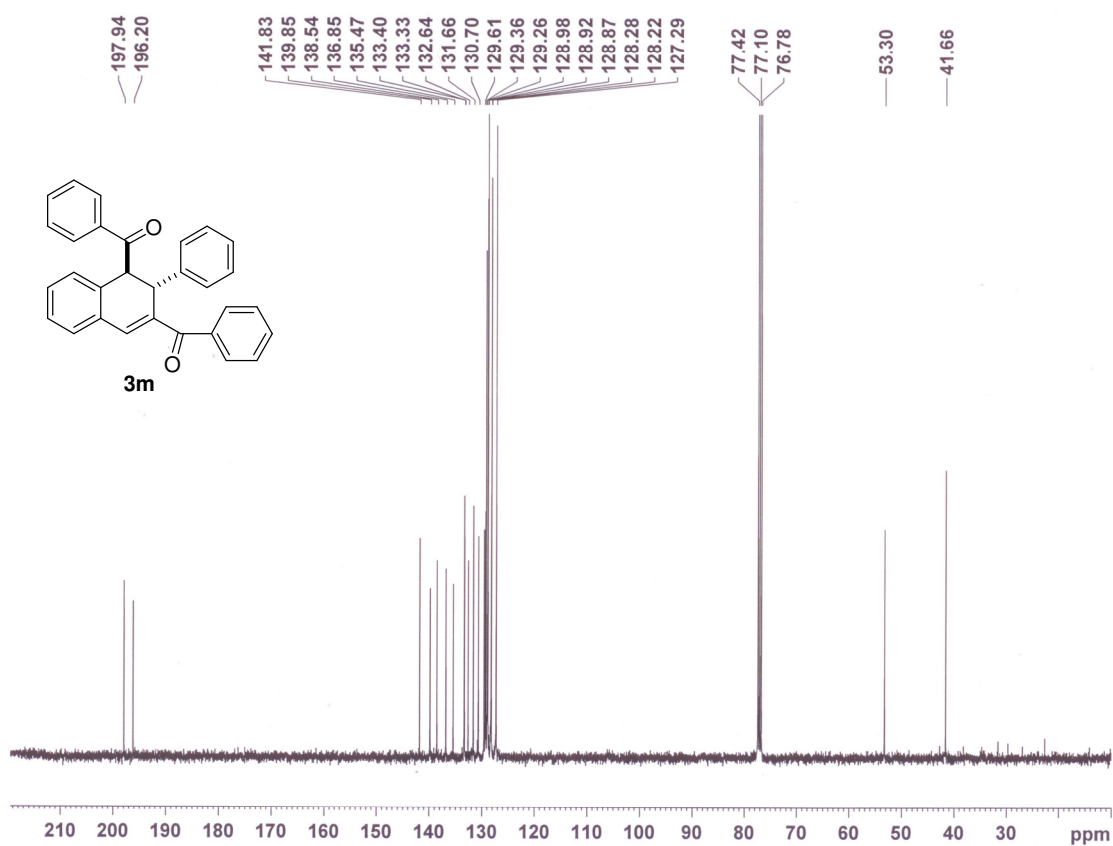

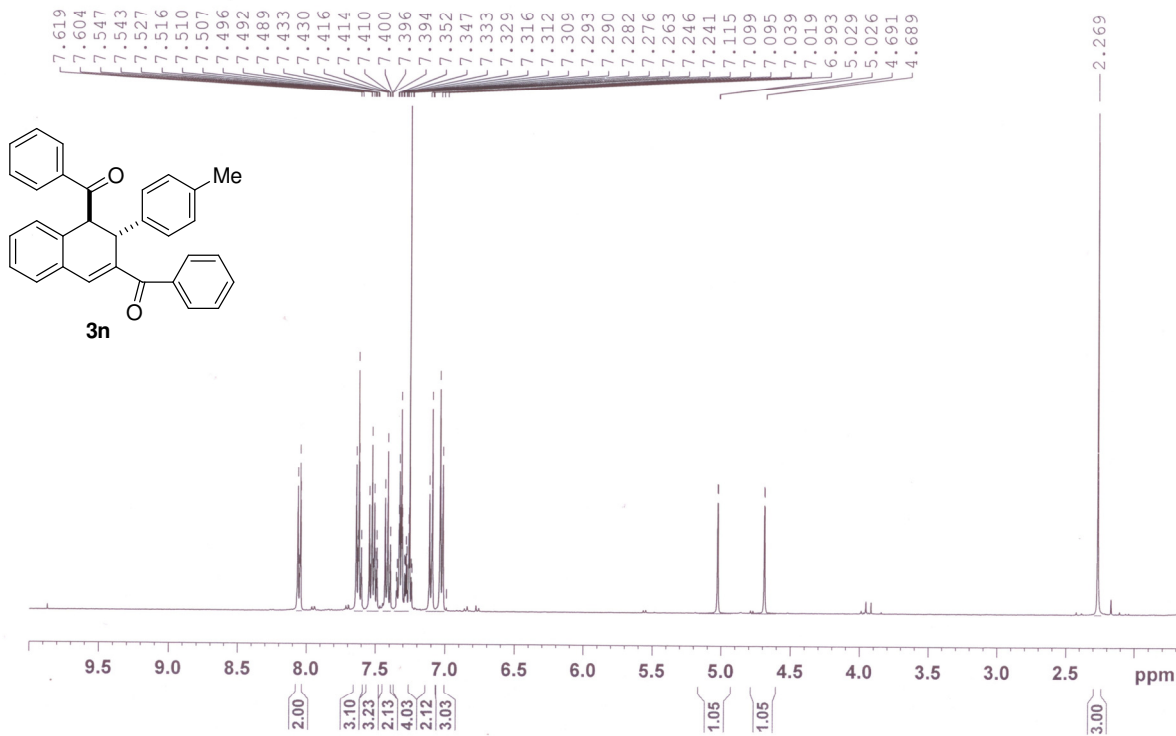



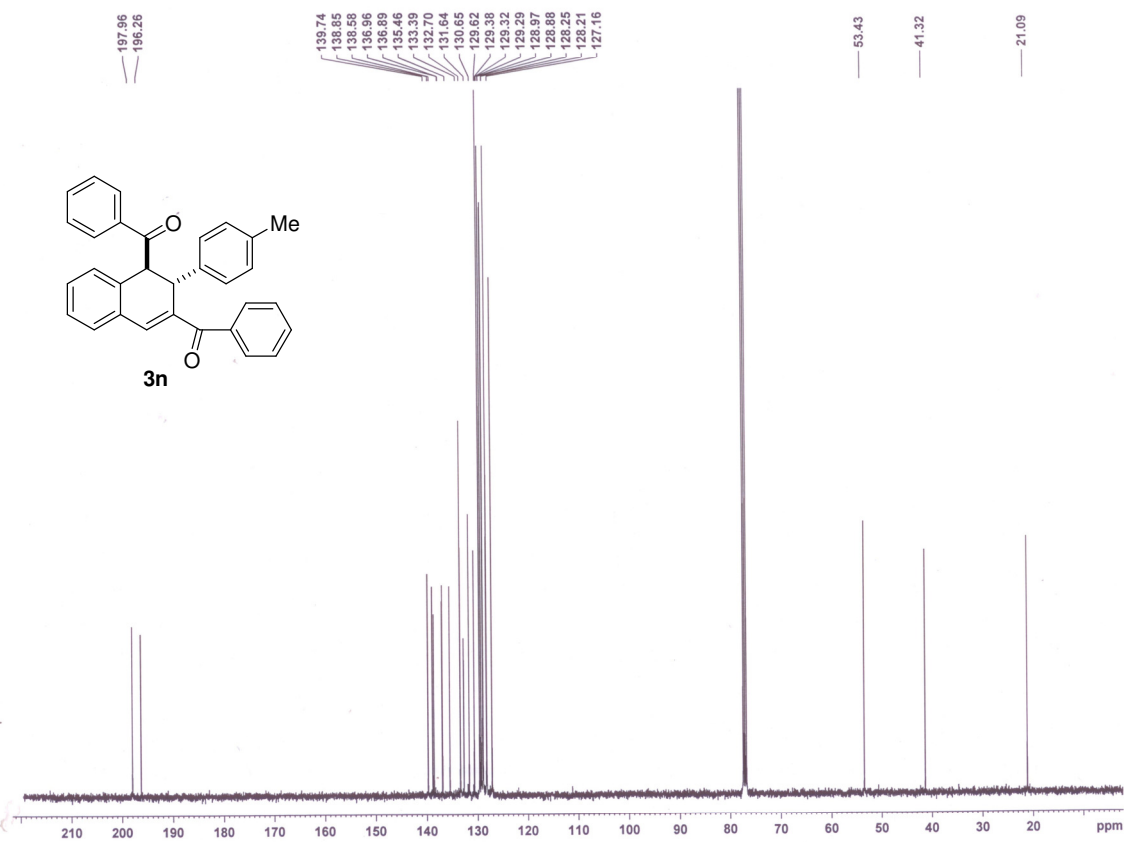

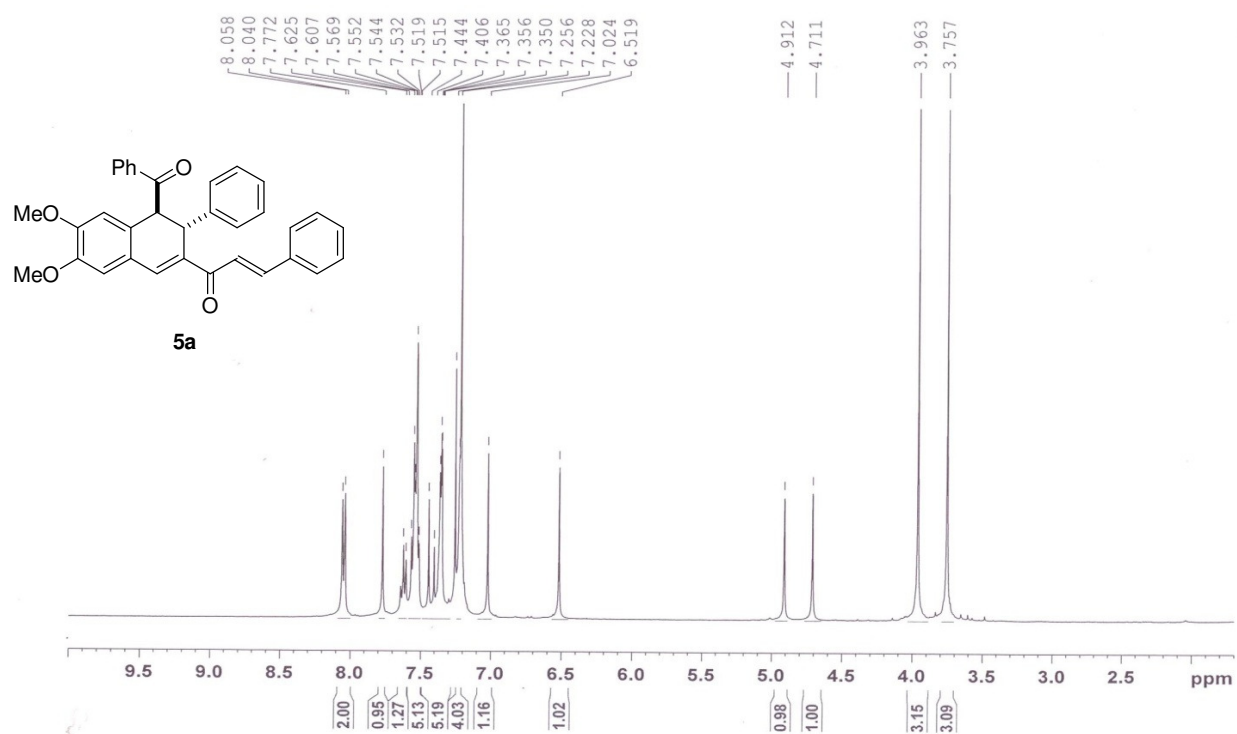

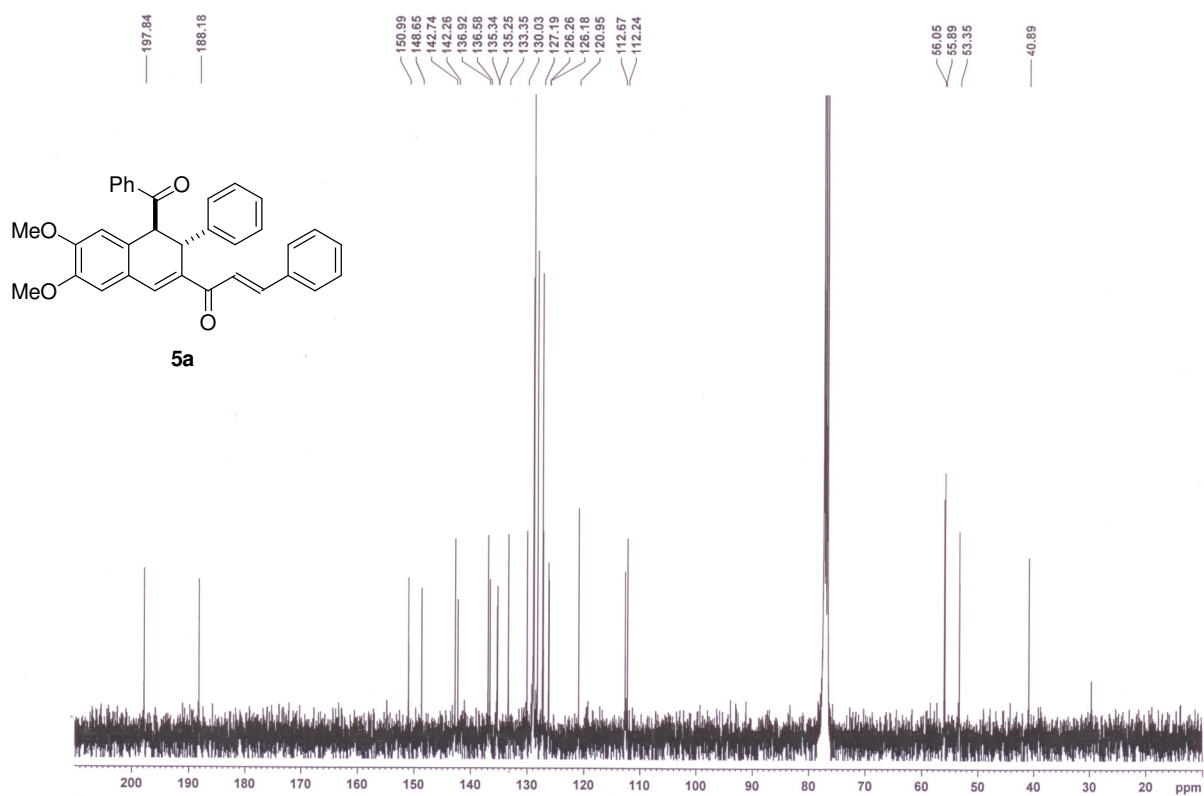

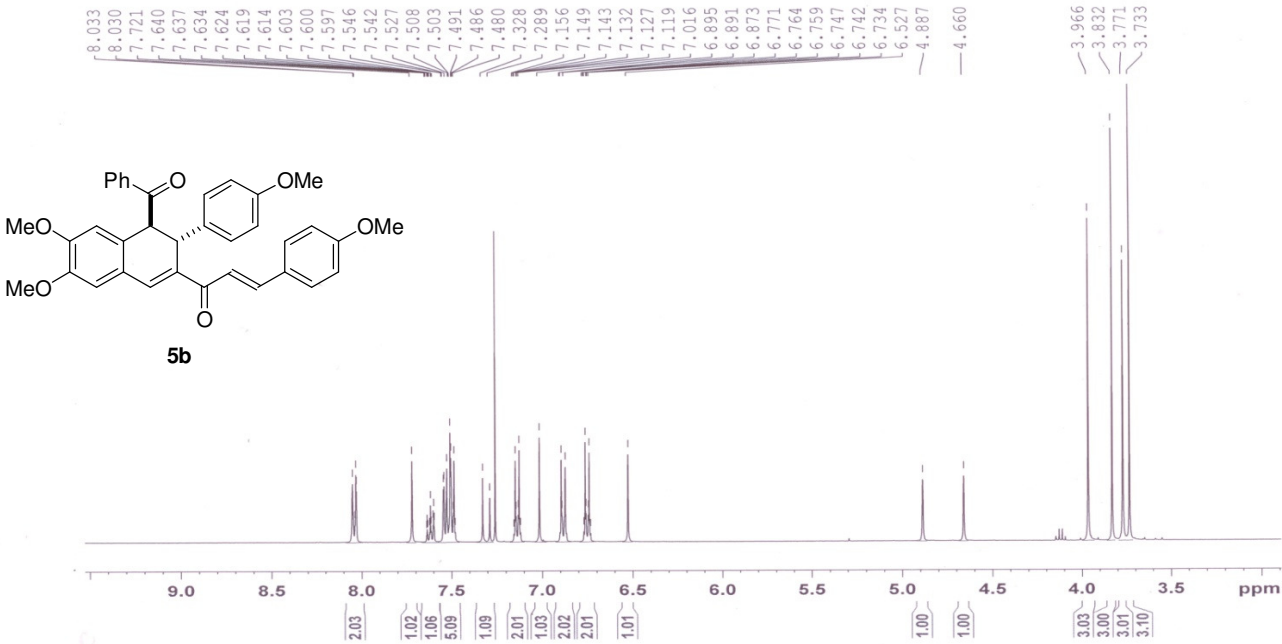

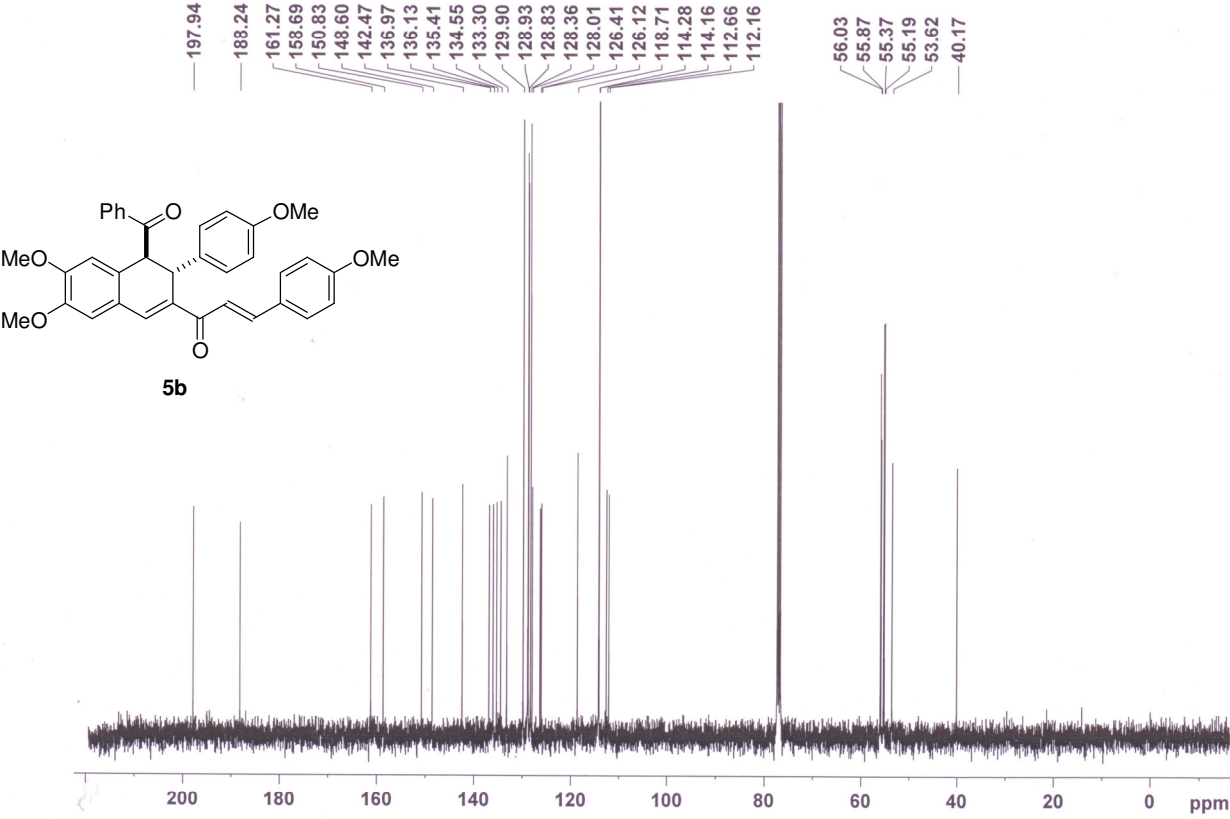

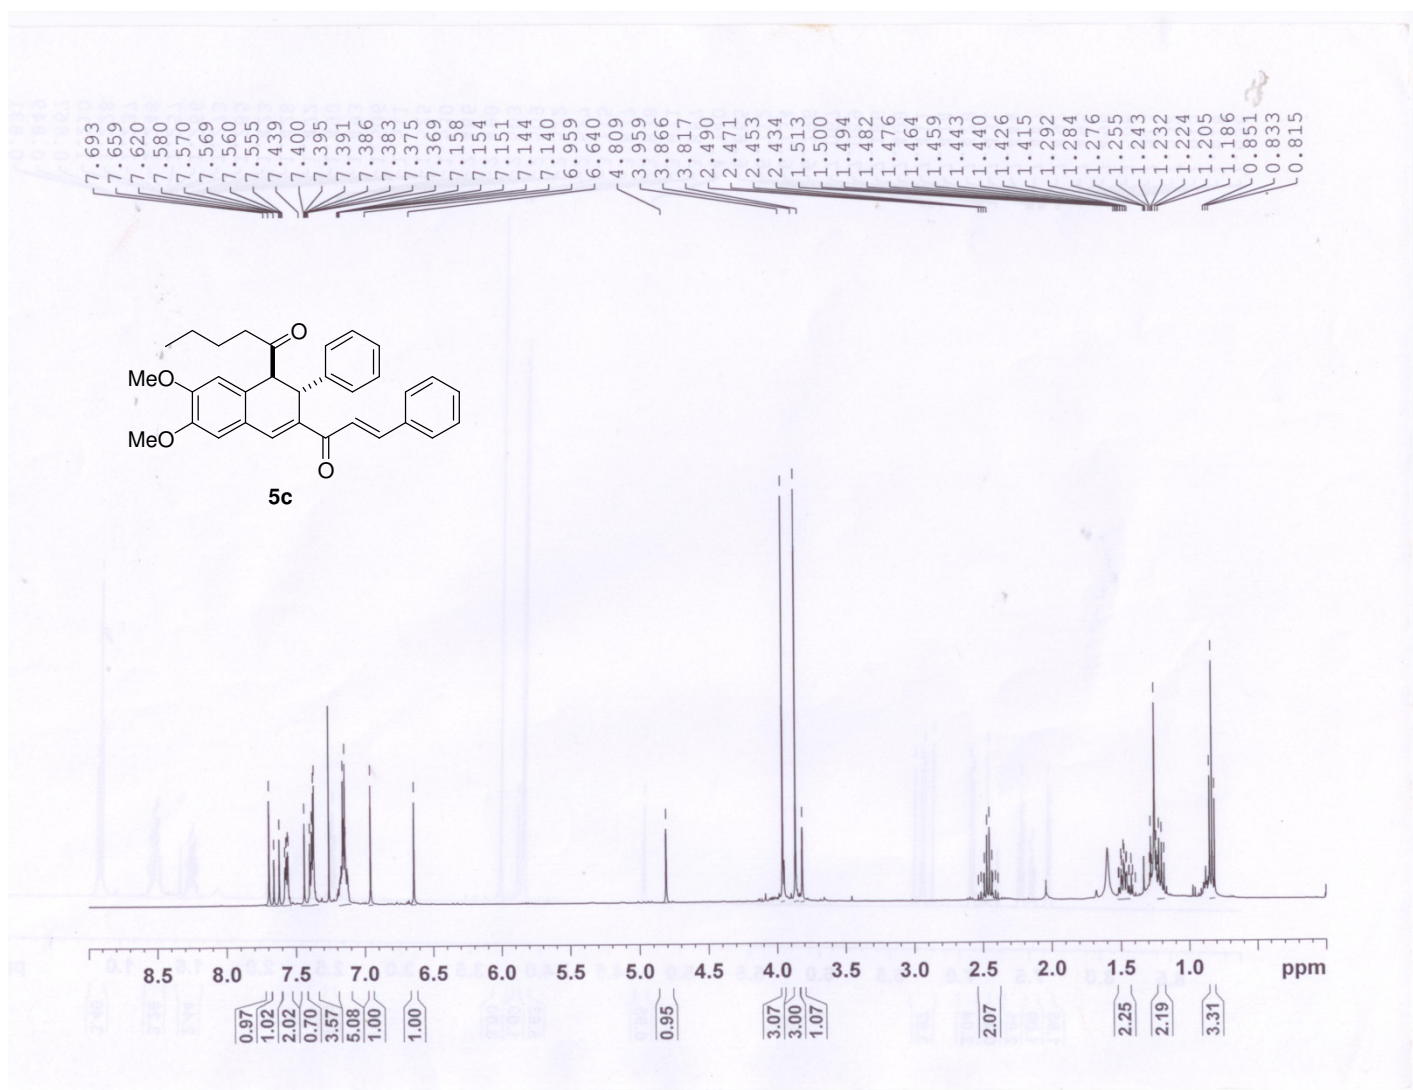

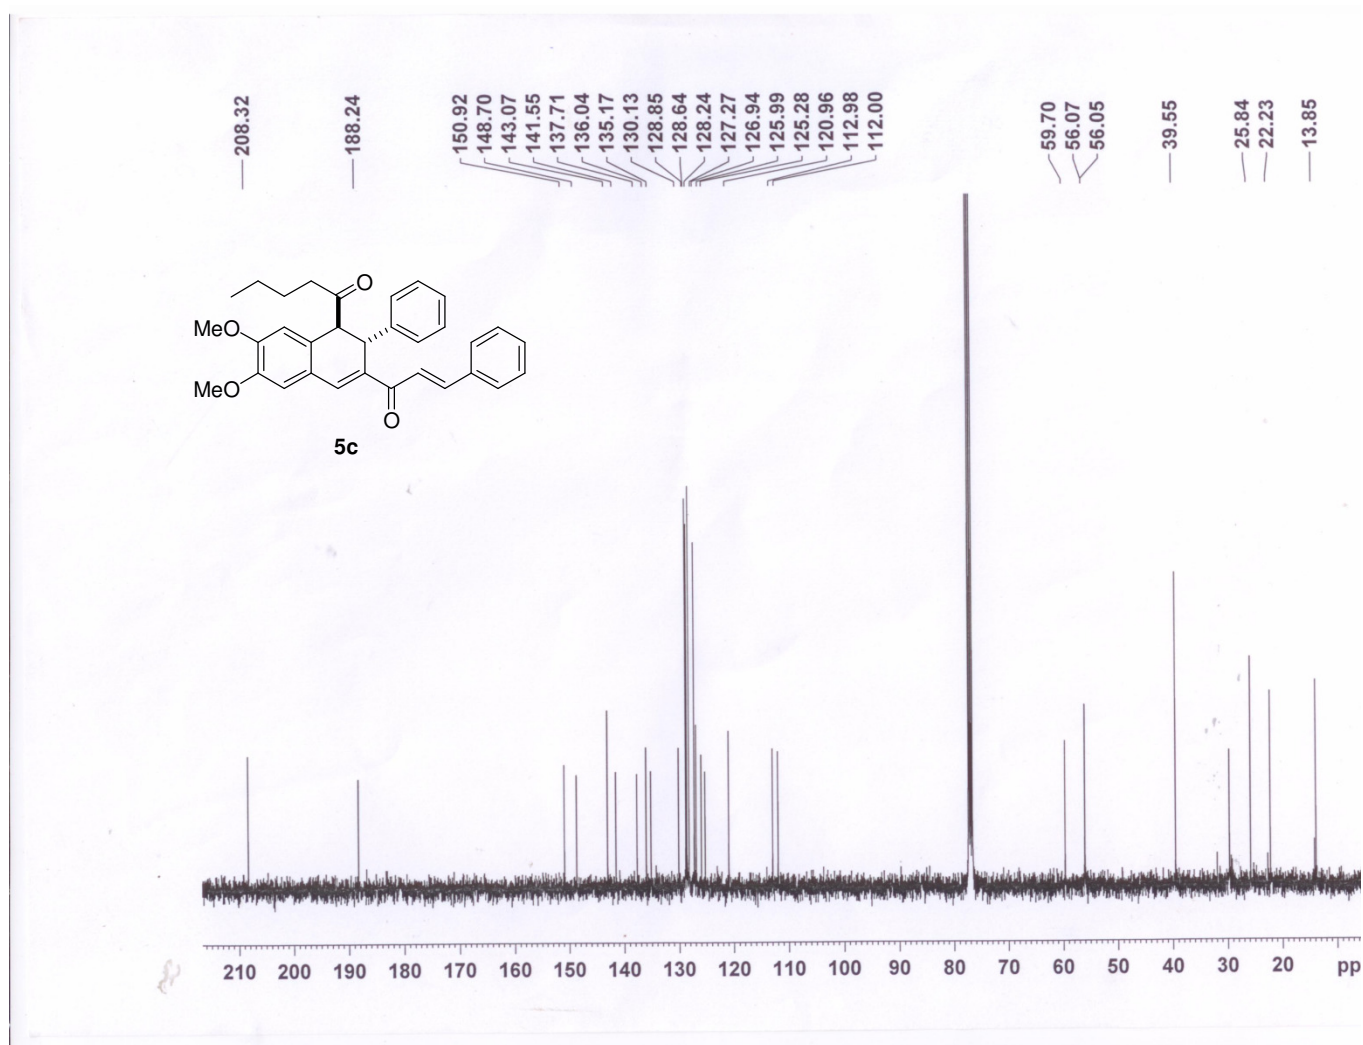

### Computation details and optimised geometries of transition states TS-1 and TS-2:

The Density Functional Theory (DFT) calculation was performed using the Gaussian 03 package. The level of approximation used was B3LYP with a basis set LanL2DZ in dichloroethane medium. The electronic energy of TS-1 is – 3026.85489823 a.u. and that of TS-2 is – 3026.79516153 a.u. This implies that **TS-1** is 37.4856 kcal mol<sup>–1</sup> more stable than **TS-2**.

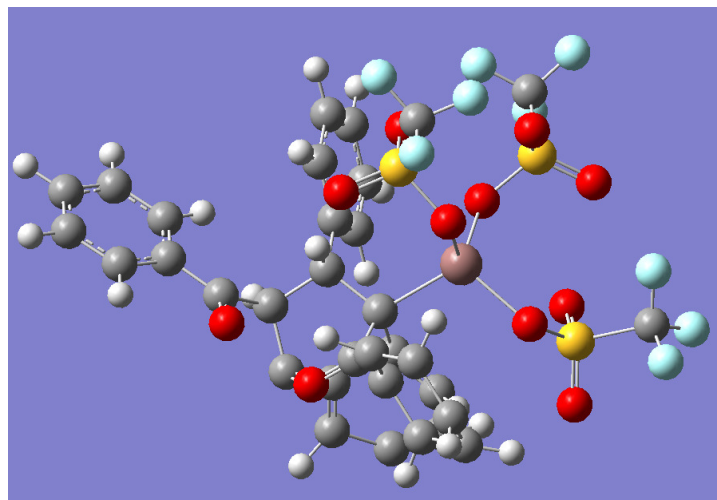

**Figure 1.** The optimised geometry of **TS-1**

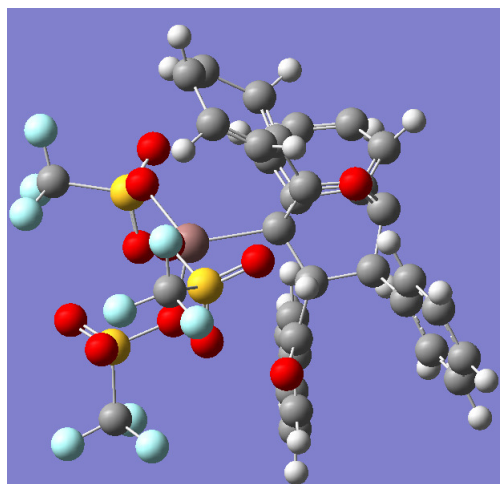

**Figure 2.** The optimised geometry of **TS-2**
